# Supplementary material
Source: PubMed Central journal article supplement (PMC3931189)
Supplement: supp_blood-2013-06-507996_blood-2013-06-507996-1.pdf [file supp_blood-2013-06-507996_blood-2013-06-507996-1.pdf]

# Supplemental Material

*Salaverria et al*

## Contents

|      |                                                                                                              |         |
|------|--------------------------------------------------------------------------------------------------------------|---------|
| I.   | Members of the network project of the Deutsche Krebshilfe “Molecular Mechanisms in Malignant Lymphomas”..... | Page 2  |
| II.  | Supplemental material and methods.....                                                                       | Page 3  |
| III. | Supplemental results and discussion.....                                                                     | Page 11 |
| IV.  | Supplemental tables.....                                                                                     | Page 14 |
| V.   | Supplemental figures.....                                                                                    | Page 36 |
| VI.  | Supplemental references.....                                                                                 | Page 47 |

## **I. Members of the Network Project of the Deutsche Krebshilfe “Molecular Mechanisms in Malignant Lymphomas” (Alphabetical order)**

**Pathology group:** Thomas F.E. Barth<sup>1</sup>, Heinz-Wolfram Bernd<sup>2</sup>, Sergio B. Cogliatti<sup>3</sup>, Alfred C. Feller<sup>2</sup>, Martin L. Hansmann<sup>4</sup>, Michael Hummel<sup>5</sup>, Wolfram Klapper<sup>6</sup>, Peter Möller<sup>1</sup>, Hans-Konrad Müller-Hermelink<sup>7</sup>, Ilske Oschlies<sup>6</sup>, German Ott<sup>20</sup>, Andreas Rosenwald<sup>7</sup>, Harald Stein<sup>5</sup>, Monika Szczepanowski<sup>6</sup>, Hans-Heinrich Wacker<sup>6</sup>. **Genetics group:** Thomas F.E. Barth<sup>1</sup>, Petra Behrmann<sup>8</sup>, Peter Daniel<sup>9</sup>, Judith Dierlamm<sup>8</sup>, Eugenia Haralambieva<sup>7</sup>, Jose-Ignacio Martín-Subero<sup>10</sup>, Paul-Martin Holterhus<sup>11</sup>, Ralf Küppers<sup>12</sup>, Dieter Kube<sup>13</sup>, Peter Lichter<sup>14</sup>, Peter Möller<sup>1</sup>, Eva M. Murga-Peñas<sup>10</sup>, German Ott<sup>20</sup>, Claudia Philipp<sup>12</sup>, Christiane Pott<sup>15</sup>, Armin Pscherer<sup>14</sup>, Julia Richter<sup>10</sup>, Andreas Rosenwald<sup>7</sup>, Carsten Schwaenen<sup>16</sup>, Reiner Siebert<sup>10</sup>, Heiko Trautmann<sup>15</sup>, Martina Vockerodt<sup>17</sup>, Swen Wessendorf<sup>16</sup>. **Bioinformatics group:** Stefan Bentink<sup>18</sup>, Hilmar Berger<sup>19</sup>, Christian W Kohler<sup>18</sup>, Dirk Hasenclever<sup>19</sup>, Markus Kreuz<sup>19</sup>, Markus Loeffler<sup>19</sup>, Maciej Rosolowski<sup>19</sup>, Rainer Spang<sup>18</sup>. **Project coordination:** Benjamin Stürzenhofecker<sup>13</sup>, Lorenz Trümper<sup>13</sup>, Maren Wehner<sup>13</sup>. **Steering committee:** Markus Loeffler<sup>19</sup>, Reiner Siebert<sup>10</sup>, Harald Stein<sup>5</sup>, Lorenz Trümper<sup>13</sup>.

<sup>1</sup>Institute of Pathology, University Hospital of Ulm, Germany, <sup>2</sup>Institute of Pathology, University Hospital Schleswig-Holstein Campus Lübeck, Germany, <sup>3</sup>Institute of Pathology, Kantonsspital St. Gallen, Switzerland, <sup>4</sup>Institute of Pathology, University Hospital of Frankfurt, Germany, <sup>5</sup>Institute of Pathology, Campus Benjamin Franklin, Charité–Universitäts-medizin Berlin, Germany, <sup>6</sup>Institute of Hematopathology, University Hospital Schleswig-Holstein Campus Kiel/Christian-Albrechts University Kiel, Germany, <sup>7</sup>Institute of Pathology, University of Würzburg, Germany, <sup>8</sup>University Medical Center Hamburg-Eppendorf, Hamburg, Germany, <sup>9</sup>Department of Hematology, Oncology and Tumor Immunology, University Medical Center Charité, Germany, <sup>10</sup>Institute of Human Genetics, University Hospital Schleswig-Holstein Campus Kiel/Christian-Albrechts University Kiel, Germany, <sup>11</sup>Division of Pediatric Endocrinology and Diabetes, Department of Pediatrics, University Hospital Schleswig-Holstein Campus Kiel/Christian-Albrechts University Kiel, Germany, <sup>12</sup>Institute for Cell Biology (Tumor Research), University of Duisburg-Essen, Germany, <sup>13</sup>Department of Hematology and Oncology, Georg-August University of Göttingen, Germany, <sup>14</sup>German Cancer Research Center (DKFZ), Heidelberg, Germany, <sup>15</sup>Second Medical Department, University Hospital Schleswig-Holstein Campus Kiel/Christian-Albrechts University Kiel, Germany, <sup>16</sup>Klinikum Esslingen, Esslingen, Germany, <sup>17</sup>Department of Pediatrics I, Georg-August University of Göttingen, Germany, <sup>18</sup>Institute of Functional Genomics, University of Regensburg, Germany, <sup>19</sup>Institute for Medical Informatics, Statistics and Epidemiology, University of Leipzig, Germany <sup>20</sup> Institute of Clinical Pathology, Robert-Bosch-Krankenhaus, Stuttgart, Germany.

## II. Supplemental Material and Methods

### Lymphoma samples

Lymphoma samples were derived from the Molecular Mechanisms in Malignant Lymphoma (MMML) cohort and a Polish cohort (Cytogenetic Laboratory The Maria Skłodowska-Curie Memorial Institute and Oncology Centre, Warsaw).<sup>1,2</sup> Additional samples were collected from single diagnostic institutions. Molecular profiling of the cases included in the MMML cohort has been published recently.<sup>3</sup>

### ***Cohort 1: Lymphomas called by both GEP classifiers (mBL and BL-PAP classifiers) Burkitt Lymphomas (n=59)***

In order to identify *MYC*-negative lymphomas with a BL gene expression profiling (GEP), two independently developed gene expression classifiers, the molecular-BL (mBL) index<sup>3</sup> and the BL-pathway activation pattern (BL-PAP classifier)<sup>4</sup> were applied to a cohort of 753 previously characterized lymphomas from the Molecular Mechanisms in Malignant Lymphoma (MMML) Network. The two algorithms selected a total of 59 BL by GEP (Cohort 1). Two of these cases lacked a *MYC* translocation and were thus considered true *MYC*-negative BL.

### ***Cohort 2: High-grade B-cell lymphomas and cell lines with features of BL, MYC negative (n=14)***

Twelve *MYC*-negative lymphomas were included for cytogenetic and genetic analyses, five of which were previously reported.<sup>1,5,6</sup> Of the total of 12 cases, eleven were included in the cohort 2 based on the diagnosis of BL/high-grade B-cell lymphoma and *MYC* break negativity and/or presence of 11q aberration. Cases 1-3 were collected from the Institute of Human Genetics, Kiel, cases 4-7 from the Polish study,<sup>1,2</sup> and cases 8-9 and 11-12 from other institutions (National Institute of Health Bethesda, Institute Biology Grenoble, Institute of Pathology Tübingen). The diagnosis of BL was based on morphological criteria and the typical immunophenotype CD20+/CD10+/BCL2-/Ki67>90 (Table 1 and supplemental Table 2)(Klapper and Szczepanowski, unpublished).

The remaining case (case 10) was recruited from a recently published study on pediatric follicular lymphoma<sup>6</sup> because of the prior knowledge of 11q-gain/loss pattern by CGH-array. This case simultaneously displayed follicular and diffuse growth pattern. Although its cytology

showed features of BL, it was classified as follicular lymphoma grade 3 (minor component) with simultaneous diffuse large B-cell lymphoma (major compartment) and it is because of this that was included in the previous series of pediatric lymphomas already published (supplemental Figure 1).

Finally HT and SU-DHL-5 cell lines ([www.dsmz.de](http://www.dsmz.de)) were selected because they were negative for *BCL2* and *MYC* breaks and had cytogenetic evidences of the 11q-gain/loss pattern. Karpas-422 carrying also 11q-gain/loss pattern was excluded as a potential model because of the presence of t(14;18). Two additional cases from the Polish cohort that showed features resembling the other cases included in the present study (CD20+, CD10+, BCL6+, BCL2-, Ki67 100%) (cases 9 and 10 from Rymkiewicz et al.<sup>2</sup>) were initially included in the present but failed copy number (CN) analyses due to bad DNA quality and were therefore not further followed (data not shown). All biopsy specimens were evaluated by at least two hematopathologists (WK and IO, ESJ, PA or GR) according to the WHO classification<sup>7</sup> (Table 1 and supplemental Table 2). Minimal regions of gain and loss in chromosome 11q were defined in this series (hg18).

### **Cohort 3: MMML cases with 11q gain/loss pattern determined by CGH-array (n=6)**

A total of 514 MMML cases with available comparative genomic hybridization (CGH)-array data were screened for aberrations in the minimal regions previously described in the cohort 2. The region of gain was covered with 15 clones in the CGH-array whereas the region of loss had 8 clones. Those cases showing at least a partial gain and a partial loss within these regions were selected. The cases displaying non-mBL GEP were excluded. Excluding one relapse sample and one case of *IG/MYC*-positive mBL, *IGH/BCL2*-positive diffuse large B-cell lymphoma (DLBCL) and *BCL6* break-positive DLBCL, a total of six cases in which the 11q-gain/loss pattern could have been the initial event were selected. Gene expression, immunohistochemical and genetic features of these cases were compared with two different sets of reference samples. First set included all samples that exhibited mBL like GEP, *IG-MYC* positivity (n=46). The second set was comprised of DLBCL samples (n=198). All cases selected had not aberrations in the minimal 11q regions. Therefore, the probability of having one “true case” with the typical 11 pattern in the control cohort was very low.

### **Institutional Review Board approval**

This study was performed as part of the MMML Network Project of the Deutsche Krebshilfe for which approval was obtained by the Institutional Review Board of the Medical Faculty Kiel under 403/05 as well as the study central. The protocols of the Berlin-Frankfurt-Münster (BFM) clinical trials have also been approved by central and local review boards.

### **FISH**

The Digital image acquisition, processing, and evaluation were performed using ISIS digital image analysis system version 5.0 (Metasystems, Altlussheim, Germany). Methods on cases 4-7 have been previously published.<sup>1</sup>

For FISH analyses, commercially available *MYC* BAP, *BCL6* BAP, *BCL2* BAP, *IGH* BAP, *MALT* BAP, *CCND1* BAP, *IGH/MYC/CEP8* and *IGH/CCND1* (all Abbott/Vysis, Downers Grove, IL) and the previously published probes *MYC* BAP 1,<sup>3</sup> *MYC* BAP 2,<sup>3</sup> FDX (+LSI ATM/CEP11)<sup>8</sup> were used. In order to detect the deletion of chromosome 11q23~24 by FISH, a probe consisting of CEP11 (CEP11 [D11Z1, Spectrum aqua, Abbot, IL, USA]), RP11-453I14 containing the genes *PKN0X2* and *FEZ1* at 11q24.1 [Spectrum Orange] and RP11-349F17 containing the *NTM* gene at 11q25 [Spectrum Green]) was designed. FISH was observed according to standard procedures. The digital image acquisition, processing, and evaluation were performed using ISIS digital image analysis system version 5.0 (Metasystems, Altlussheim, Germany). FISH methods on samples 4-7 have been previously published.<sup>1</sup>

### **DNA extraction**

DNA extraction from the lymph node, paraffin material or cells in fixative was performed using standard protocols. DNA from SU-DHL-5 and HT cell lines (provided by DSMZ) was extracted from cultured cells.

### **Copy number analyses**

GeneChip Mapping SNP 6.0 (Affymetrix, Santa Clara, CA) was used in cases 1-3 and 8 as previously described.<sup>9</sup> Cases 4-7 and 9-12 were analyzed using the Agilent Human CGH Microarray platform (244K, only case 9 on 180K; Agilent Technologies, Santa Clara, CA) due to methodological requirements for formalin fixed paraffin embedded (FFPE) tissues. Genotyping Console (Affymetrix inc) was used to analyze copy number changes of SNP 6.0 array whereas Agilent arrays were analyzed using DNA Analytics (Agilent Technologies inc.) and/or Nexus CN 6.0 Discovery Edition (BioDiscovery, El Segundo, CA). Gains and losses on MPI samples (MMML Cohort) were analyzed as previously described.<sup>10</sup> Additionally, the chromosome 11 was analyzed in all samples from the 'cohort 2' and 'cohort 3' (except MPI-315 and MPI-382) using Nexus 6.0 beta Discovery Edition (BioDiscovery, El Segundo, CA). Genetic complexity was defined as the number of CN aberrations per tumor sample.

### **Mutational analyses**

PCR and direct sequencing of the PCR products were performed using the Big Dye Terminator v1.1 Cycle Sequencing Kit and the 3100-Avant Genetic Analyzer. Primers are summarized in supplemental Table 3. Polymorphic variants referenced in NCBI dbSNP Build 132 (<http://www.ncbi.nlm.nih.gov/projects/SNP/>) and 1000 genomes Project (<http://www.1000genomes.org/page.php>) were excluded. Non-synonymous mutations were tested for their functional consequences *in silico* by using different aminoacid substitution prediction algorithms, including SIFT (Sorting Intolerant From Tolerant) and PolyPhen-2 (Polymorphism Phenotyping).

### **Bisulfite pyrosequencing analyses**

Methylation levels of hsa-mir-34b were studied in cases 1-7 from cohort 2 and SU-DHL-5 cell line, and in six *MYC*-positive BL and three *MYC*-positive BL cell lines (Ca-46, Daudi, Raji).

Bisulfite conversion and pyrosequencing was performed according to standard methods. The results were evaluated with the analysis software Pyro Q-CpG 1.0.9 (Biotage AB, Uppsala, Sweden), which was also used to quantify the percentage of methylated cytosines at the

analyzed CpG sites. All assays were optimized and validated using one complete methylated commercial available DNA (Millipore, Schwalbach, Germany) as positive control and an unmethylated pooled DNA isolated from 10 male and female controls as negative control. Primer sequences are shown in supplemental Table 3. Heterogeneous methylation patterns of hsa-mir-34b were found in the seven cases from the cohort 2 (Supplemental Figure 3). Cases 1, 3 and 7 displayed low levels of methylation (mean: 7, 7 and 3.5% respectively), whereas cases 2, 4, 5 and 6 showed higher levels of methylation (mean: 33, 36, 41 and 45%, respectively). The SU-DHL-5 cell line presented high levels of methylation (mean: 92%), similarly to the *IG-MYC*-positive BL cell lines (mean: 87%), and one primary case *IG-MYC*-positive BL (mean: 66%).

### **Exome sequencing data processing and Single Nucleotide Variant (SNV) and Small Indel Detection**

For each sequencing lane, read pairs were mapped to the human reference genome (hg19, NCBI build 37.1, downloaded from the UCSC genome browser at <http://genome.ucsc.edu/>) using BWA version 0.5.9-r16 with default parameters and maximum insert size set to 1 kb. Samtools<sup>11</sup> was used to generate a chromosomal coordinate-sorted BAM file. PCR duplicates were removed using Picard tools (version picard-1.48, <http://picard.sourceforge.net>). Only uniquely aligned reads (minimum mapping quality of 1) overlapping on-target regions were considered for downstream analysis. Coverage calculations following duplicate removal considered all informative bases of the reference genome (excluding Ns). A mean Phred-scaled base quality of at least 25 across the length of the read was required. Detection of single nucleotide variants (SNVs) and small indels was done as described before.<sup>12,13</sup> Filtered calls were functionally annotated using Annovar<sup>14</sup> gene annotation and annotated for overlaps with dbSNP build 135 SNPs and variants from the 1000 Genomes project using BED Tools.<sup>15</sup>

### **Gene expression analyses**

To evaluate the impact of 11q alterations in the GEP, differential gene expression analysis was performed using linear models for microarrays as implemented in the Bioconductor package

limma<sup>16</sup> version 3.8.0. False discovery rates (FDR) were calculated according to Benjamini and Hochberg.<sup>17</sup> Lists of differentially expressed genes were generated such that the FDR of the entire list is below .05.

To evaluate the direct impact of CN alterations, expression levels of genes within the minimal gained and lost region on chromosome 11 were compared between lymphomas with 11q gain/loss pattern and control groups.

The expression levels were compared by Student's t-test using R package multitest.<sup>18</sup> A FDR cut-off of 0.1 was applied adjusting for the number of probesets within gain and loss region separately.

The differentially expressed genes between 11q-gain/loss and DLBCL or BL were investigated for significant over-representation by a hypergeometric test. Hereby, a list of differential genes is tested against a given set of genes contributing to particular Gene Ontology (GO) term which in turn is a subset of a GO category. A GO term is termed significant if the individual hypergeometric test results in a P-value below .05. Correction for multiple testing was performed by adjusting the P-values according to the procedure of Benjamini-Hochberg.<sup>17</sup> The three GO categories - Molecular Function (MF), Biological Process (BP) and Cellular Component (CC) with their respective GO term - were tested separately.

### **MicroRNAs expression analysis**

Test for overrepresentation of microRNA (miRNA) targets within a list of differentially expressed genes was performed in multiple hypergeometric tests as implemented in the HTSanalyzeR package (version 2.8.0).<sup>19</sup> In this setting, the 'universe' is represented by the entire amount of probe sets on the hg133A chip (n=22283), whereas the number of differentially expressed genes constitute the 'observed hits'. We use the miRNA target sets within the gene set collection 'C3-motif gene sets' provided by the Broad Institute (<http://www.broadinstitute.org>), consisting of a total of 221 miRNA target gene sets. As a prerequisite, we require that each gene set contains at least 15 elements. Hence, a total of 213 gene sets remain for hypergeometric testing in this overrepresentation analysis. Each miRNA target set is tested for



enrichment in the list of differentially expressed genes. Statistical significance for overrepresentation of the individual miRNA target set ('expected hits') is assessed at the 0.05 level. Correction for multiple testing was performed by adjusting the *P*-values according to the procedure of Benjamini-Hochberg.<sup>17</sup>

### **Survival analysis**

Survival curves were estimated by the Kaplan-Meier method. Survival differences were analyzed with the log-rank test. *P* values  $\leq 0.05$  were considered to indicate statistical significance.

### **Western Blot**

Preparation of whole cell lysates from cell lines was done using RIPA buffer as described in the literature. Protein samples, suspended in water and 5x Lämmli buffer, were separated using Any kD Criterion TGX gels (Bio-Rad, München, Germany) and transferred to Immobilon-P Transfer Membrane (Millipore, Darmstadt, Germany). Membrane was blocked in 6% milk buffer-TBS-T for one hour at room temperature and afterwards incubated with the primary antibody PFAH1B2 mouse monoclonal antibody (M01A, clone 2FA-1C10, Abnova, Heidelberg, Germany). Lamin B1 (ab16048, Abcam, Cambridge, UK) and monoclonal anti- $\beta$ -actin (Sigma-Aldrich, Steinheim, Germany) acted as reference genes. After washing, membranes were incubated for one hour at room temperature with HRP-conjugated donkey anti-rabbit IgG (DkxRb-003-DHRPX, ImmunoReagents Inc., Raleigh, USA) or donkey anti-mouse IgG (DkxMu-003-DHRPX, ImmunoReagents Inc.) and developed in Luminara Forte Western HRP Substrate (Millipore, Darmstadt, Germany). Signals were detected using Hyperfilm ECL (GE Healthcare, München, Germany).

### **Cell lines**

Human BL cell lines BL-2, BL-41, BL-70, BLUE-1, Ca-46 and U-698-M, human DLBCL cell lines Karpas-422, SU-DHL-6 and SU-DHL-10 and cell lines with 11q-gain/loss pattern HT, SU-DHL-5

and MLMA (latter described by the Sanger Center) were obtained from the Leibniz Institute DSMZ-German Collection of Microorganisms and Cell Culture, except MLMA which was obtained from the Japanese Collection of Research Bioresources Cell Bank and cultivated according to the company's indications. Identity of cell lines was verified using Stem Elite ID (Promega, Mannheim, Germany).

### III. Supplemental Results and Discussion

#### FISH validation

FISH analyses validated the array-based data and confirmed the presence of 11q gains and losses in the 'cohort 2' (Table 2). In contrast, the reported t(11;14) translocation in cases 6 and 7<sup>1</sup> was not confirmed by the use of a *CCND1* break apart probe. In case 3, the combination of R-banding and SNP-array data allowed the identification of the marker chromosome as a der(11)t(11;18)(q23;q21). The high frequency of 18q21-q22 breaks present in 4/12 cases is remarkable. A recent study has pointed *TCF4* gene, located in 18q21.2, as a candidate gene involved in an alternative mechanism to *ID3* mutations in the pathogenesis of BL.<sup>13</sup> There was no evidence for involvement of the *MALT1* or *BCL2* oncogenes in the breakpoint region although two cases (1 and 3) presented gain of these genes.

#### hsa-mir-34b methylation levels

Recently, hsa-mir-34b was described to be down-regulated in BL cases that were negative for *MYC* translocation.<sup>20</sup> Remarkably, the hsa-mir-34b is located in 11q23.1 (chr11:110,888,873-110,888,956bp, hg18) and, thus, in the recurrently gained rather than the lost region. Thus, we analyzed the DNA-methylation of hsa-mir-34b. Heterogeneous methylation patterns of hsa-mir-34b were found in cases 1-7 from the cohort 2 (supplemental Figure 3). Additionally, we found no significant enrichment of hsa-mir-34b annotated target genes (Molecular Signatures Database, MSigDB) among the genes that were differentially expressed between cases with the 11q-gain/loss pattern and *Ig-MYC*-positive mBL, nor between these cases and DLBCL.

#### Supplemental discussion

Screening the Mitelman (<http://cgap.nci.nih.gov/Chromosomes/Mitelman>) and Progenetix database ([www.Progenetix.org](http://www.Progenetix.org)) (17th September 2012) for pediatric lymphomas, 10 out of 31 cases (32%) diagnosed as BL/Atypical without the t(8;14) translocation or variants presented alterations on chromosome 11

Specifically, two carried the duplication dup(11)(q13q23) and four presented additions at 11q23 or add(11)(q?).<sup>21-24</sup> On the other hand, *Pienkowska-Grela et al* reported an inversion of the gained region 11q13-q23 in four *MYC*-negative cases with typical BL morphology.<sup>1</sup> We also confirmed this in one additional case. Whether this cytogenetic change juxtaposes regulatory elements with a putative proto-oncogene is unknown. Breakpoints between the regions of gain and loss were not conserved in this series, but all of them were placed near the common fragile site FRA11G and the rare fragile site FRA11B, both located at 11q23.<sup>25</sup> However, there was no evidence that breakpoints were directly affecting these fragile sites (supplemental Figure 4B).

Remarkably, the *ATM* gene which is assumed to be a tumor suppressor gene<sup>26</sup> was located in the region of gain in 13/19 samples. With the exception of case 1 (that was known to have the AT syndrome), in which additionally to the gain a simultaneous mutation and CNN-LOH was detected, clinically no evidence of AT or immunodeficiency was reported in the remaining cases. Moreover, exome sequencing failed to identify *ATM* mutations in the cell lines investigated rendering a major role of *ATM* in the aberration unlikely.

Regarding the *ETS1* mutational analysis, case 5 (mutation G331G) and case 7 (mutation E22K) displayed a low fraction of the mutated allele. Surprisingly, both cases also showed mutations in other exons in which the mutated allele was the predominant. These results together with the fact that these cases showed a deletion in 11q including the *ETS1* gene, lead us to speculate about the possible presence of subclones. Moreover, our attempts to model the effect of the mutations yielded no striking results due to the low number of mutations found in our series, and the fact that none of the point mutations were within resolved three-dimensional structures. However, both P→A (case 5) and E→K (case 7) lie at the N-terminus of the protein, and are close (in two of three isoforms of *ETS1*) to the Pnt domain which could influence the interaction with other proteins.<sup>27</sup> In contrast, the Y→X/del (case 8) which removes the DNA binding domain, and the S→F mutation, which lays 10 residues N-terminal to this domain, are more likely to influence the DNA binding.

Concerning the genes involved in the frequent co-deletions of 6q observed in this series, the *EPHA7* gene (6q16) has been recently described as a tumor suppressor in follicular lymphoma with interesting therapeutical involvements.<sup>28</sup> Moreover, inactivating mutations in *PRDM1* (6q21) that result in the generation of a severely truncated non functional protein, are found in about 20% of the DLBCLs.<sup>29</sup>

#### IV. Supplemental Tables

**Supplemental Table 1.** Case selection of Cohort 2.

| Case     | Morphologic features | IHC features | MYC-negativity | 11q alteration by cytogenetics | 11q-gain/loss pattern by arrays | Reference paper                                      |
|----------|----------------------|--------------|----------------|--------------------------------|---------------------------------|------------------------------------------------------|
| Case 1   | x                    | x            | x              |                                |                                 |                                                      |
| Case 2   | x                    | x            | x              |                                |                                 |                                                      |
| Case 3   | x                    | x            | x              |                                |                                 |                                                      |
| Case 4   | x                    | x            | x              | x                              |                                 | Pienkowska-Grela et al <sup>1</sup>                  |
| Case 5   | x                    | x            | x              | x                              |                                 | Pienkowska-Grela et al <sup>1</sup>                  |
| Case 6   | x                    | x            | x              | x                              |                                 | Pienkowska-Grela et al <sup>1</sup>                  |
| Case 7   | x                    | x            | x              | x                              |                                 | Pienkowska-Grela et al <sup>1</sup>                  |
| Case 8   |                      |              | x              | x                              |                                 |                                                      |
| Case 9   | x                    | x            | x              |                                |                                 |                                                      |
| Case 10  |                      |              | x              |                                | x                               | Oschlies et al/ Martin-Guerrero et al <sup>5,6</sup> |
| Case 11  | x                    | x            | x              |                                |                                 |                                                      |
| Case 12  | x                    | x            | x              |                                |                                 |                                                      |
| HT       |                      |              | x              | x                              |                                 |                                                      |
| SU-DHL-5 |                      |              | x              | x                              |                                 |                                                      |

\*Case 10 displayed simultaneously a follicular and diffuse growth pattern. Although its cytology showed features of BL, it was classified as follicular lymphoma grade 3 (minor component) with simultaneous diffuse large B-cell lymphoma (major compartment).<sup>5,6</sup>

BL: Burkitt Lymphoma; IHC: immunohistochemical.

**Supplemental Table 2.** Morphological characteristics of the samples included in the study (cohort 2 and cohort 3)

| Case           | Quality             | Growth pattern | Cytology  |                   |           |               |                                 | Bystander       |
|----------------|---------------------|----------------|-----------|-------------------|-----------|---------------|---------------------------------|-----------------|
|                | morphologic quality | starry sky     | cell size | cell polymorphism | cytoplasm | nuclear shape | Burkitt like-chromatin/nucleoli | bystander cells |
| Case 1/MPI-626 | poor                | na             | na        | Na                | na        | na            | na                              | na              |
| Case 2         | good                | 1              | 1         | 1                 | 1         | 1             | 2                               | 1               |
| Case 3         | good                | 1              | 1         | 2                 | 1         | 1             | 1                               | 1               |
| Case 4         | good                | 1              | 1         | 1                 | 1         | 1             | 1                               | 1               |
| Case 5         | reduced             | 1              | 1         | 1                 | 1         | 1             | 1                               | 1               |
| Case 6         | poor                | 1              | 1         | 2                 | 1         | 1             | 2                               | na              |
| Case 7         | good                | 1              | 1         | 1                 | 1         | 1             | 1                               | 1               |
| Case 8         | poor                | 2              | 1         | 1                 | na        | 1             | 1                               | 1               |
| Case 9         | good                | 1              | 1         | 2                 | na        | 1             | 1                               | na              |
| Case 10        | good                | 1              | 1         | 1                 | 1         | 1             | 1                               | 1               |
| Case 11        | good                | 1              | 1         | 1                 | 1         | 2             | 1                               | 1               |
| Case 12        | good                | 1              | 1         | 1                 | 1         | 1             | 1                               | 1               |
| MPI-078        | good                | 1              | 1         | 1                 | 1         | 2             | 2                               | 1               |
| MPI-086        | poor                | na             | na        | Na                | na        | na            | na                              | na              |
| MPI-148        | reduced             | 1              | 1         | 1                 | 1         | 1             | 2                               | 1               |
| MPI-315        | reduced             | 2              | 2         | 1                 | 1         | 1             | 2                               | 1               |
| MPI-382        | good                | 1              | 1         | 1                 | 1         | 2             | 1                               | 1               |

**Morphological scoring criteria:** in bold=pro-Burkitt/ italics=against Burkitt

**growth pattern**

starry sky

**1= yes (cohesive growth, tingible body macrophages) , 2= no**

**cytology**

cell size

**1= medium (nuclei similar or smaller than those of histiocytes), 2= large (nuclei larger than those of histiocytes)**

cell polymorphism

**1= no, 2=yes**

cytoplasm

**1= narrow, 2= abundant**

nuclear shape

**1= round, 2= irregular**

Burkitt-like

chromatin/nucleoli

**1= yes (moderately dense chromatin, inconspicuous nucleoli) , 2= no** (Similar to other lymphomas Centroblastic-like, Immunoblastic-like, Lymphoblastic-like)

**bystander**

bystander cells

**1= scattered, 2= moderate (clusters >10 cells), 3= abundant (outweighing lymphoma cells)**

**na: not available**



**Supplemental Table 3. Primer information for mutational and methylation analysis**

| <b>Exon</b>        | <b>Sequence (5'-3')</b>                      | <b>PCR product length (bp)</b> |
|--------------------|----------------------------------------------|--------------------------------|
| FLI1_exon1_F       | TGTAACCGGGTCAATGTGTG                         | 176                            |
| FLI1_exon1_R       | GAGAGAGGCCACGTCTTCC                          |                                |
| FLI1_exon2_F       | TGAAGAGTGACACTGGGCTTT                        | 298                            |
| FLI1_exon2_R       | TTTGTGCCTTCCCCCAAT                           |                                |
| FLI1_exon3_F       | GCCTCTGGGCTTTGTCTCTT                         | 206                            |
| FLI1_exon3_R       | GCAGCCTGGTTCTCGAATTA                         |                                |
| FLI1_exon4_F       | TGCTAACAACGTCTTCTCCTCT                       | 250                            |
| FLI1_exon4_R       | GGTACTTGGGCGGCACTTAC                         |                                |
| FLI1_exon5_F       | TCCCTCCTCATGTCATCTCC                         | 235                            |
| FLI1_exon5_R       | CAAGCTGGTTTTCTGCAACA                         |                                |
| FLI1_exon6_F       | GAAGCAGGCGATGCTAATGT                         | 176                            |
| FLI1_exon6_R       | CCTGTTCTCCAATCCTGTCC                         |                                |
| FLI1_exon7_F       | TGCATTTCTTTCCCTCTTGC                         | 136                            |
| FLI1_exon7_R       | TCAACAACGTGCAGGAAGC                          |                                |
| FLI1_exon8_F       | GGTTTTCTTATGGTTGGTACGG                       | 220                            |
| FLI1_exon8_R       | CCCCTCAGGTGTCTGGACT                          |                                |
| FLI1_exon9a_F      | TCTCTGGGCTGAGGTGTTCT                         | 214                            |
| FLI1_exon9a_R      | ATTCATGTTGGGCTTGCTTT                         |                                |
| FLI1_exon9b_F      | AAAGCAAGCCCAACATGAAT                         | 264                            |
| FLI1_exon9b_R      | AGGAAGTGACAGGCATGGAG                         |                                |
| FLI1_exon9c_F      | CTCCATGCCTGTCACTTCT                          | 212                            |
| FLI1_exon9c_R      | TGTTGAGTCCAAAGCATCCA                         |                                |
| ETS1_2_F           | AAGGTTTCGTGTCTTCCTTGTG                       | 273                            |
| ETS1_2_R           | AGTTCAGGTTCCCTGGCTTCTC                       |                                |
| ETS1_3_F           | AAACAAGAGTTGGCTCTGTTCTG                      | 365                            |
| ETS1_3_R           | GAAAGAATGCAGCCCTCATC                         |                                |
| ETS1_4_F           | AAGAAAGTCGATTTCCCC                           | 308                            |
| ETS1_4_R           | CTCCTGAAGAAATGCACCG                          |                                |
| ETS1_5_F           | GCCTTCTTACAGCCCATTTG                         | 275                            |
| ETS1_5_R           | CAGGTGAGAAAATGTGTCTTCC                       |                                |
| ETS1_6_F           | GTGTCCTCTCTGAGGCTTGG                         | 353                            |
| ETS1_6_R           | CCCACCATTGGGTGAGC                            |                                |
| ETS1_7_F           | CCAAGATCCTTTTAGGCCAAG                        | 232                            |
| ETS1_7_R           | GAAGGAGCCTGAGATTCACTG                        |                                |
| ETS1_8_F           | GCTTGTCCCACATCATAGGG                         | 476                            |
| ETS1_8_R           | AGATGGGAAGGCTGAACTG                          |                                |
| ETS1_9_F           | AATCTGTCCTCCATAAGAGGG                        | 419                            |
| ETS1_9_R           | CCTCCAGGACCCACC                              |                                |
| ETS1_10_F          | TGGGGATTAGCTGCGTAGAG                         | 276                            |
| ETS1_10_R          | CTGGAACACGTCATTCAGGC                         |                                |
| ETS1_11_F          | TGGGTATAGCATAGGCATAGAAAC                     | 375                            |
| ETS1_11_R          | TTCAGAGTCCAACCAACACG                         |                                |
| hsa-mir-34b_PS-FP  | GTGTTTTGTTTTGATGGTAGTGGAGTTAGTGATTGTAATT     | 185                            |
| hsa-mir-34b_PS-RP  | Biotin-CCAACCATAATAAAACCTCCCCCATAAAAATAAAATC |                                |
| hsa-mir-34b_PS-seq | ATAATTAGTTAATGATATTGTTTAT                    |                                |

F: forward; R: reverse; bp: base pairs

**Supplemental Table 4.** Global table of copy number alterations (cohort 2 + cohort 3)

| <b>Case No.</b> | <b>Alteration</b>   | <b>Start*</b> | <b>Stop*</b> | <b>Size (Mb)</b> |
|-----------------|---------------------|---------------|--------------|------------------|
| <b>COHORT 2</b> |                     |               |              |                  |
| <b>Case 1</b>   |                     |               |              |                  |
|                 | ampl 1q21.2-q21.2   | 148685774     | 148941059    | 0.26             |
|                 | gain 2q21.3-q22.1   | 136125291     | 137663460    | 1.54             |
|                 | gain 3q27.3-q28     | 189042530     | 191120493    | 2.08             |
|                 | gain 3q29           | 195204051     | 199293383    | 4.09             |
|                 | loss 4q21.21-q22.1  | 81489318      | 93269598     | 11.78            |
|                 | gain 4q23-q24       | 102280753     | 104354915    | 2.07             |
|                 | loss 6q13-q22.2     | 74993911      | 118220610    | 43.23            |
|                 | gain 7p21.3         | 11240265      | 11413684     | 0.17             |
|                 | gain 7q34-qter      | 140514593     | 158812469    | 18.30            |
|                 | gain 8q23.1-q24.22  | 109813698     | 134442702    | 24.63            |
|                 | gain 11q12.1-q23.3  | 59689284      | 119681559    | 59.99            |
|                 | loss 11q23.3-qter   | 119707054     | 134452384    | 14.74            |
|                 | ampl 12q12-q13.12   | 42863301      | 47443460     | 4.58             |
|                 | gain 13q22.3-q33.2  | 76775526      | 104991992    | 28.22            |
|                 | loss 13q33.2-qter   | 104993812     | 114125098    | 9.13             |
|                 | loss 14q32.33       | 105149735     | 105346366    | 0.20             |
|                 | gain 14q32.33       | 105613310     | 106247258    | 0.63             |
|                 | gain 18q12.1        | 28544883      | 28653780     | 0.11             |
|                 | gain 18q12.3-q22.1  | 39073072      | 60244448     | 21.17            |
|                 | ampl 18q21.1-q22.1  | 45653539      | 60244448     | 14.59            |
|                 | loss 18q22.1-qter   | 60252055      | 76116029     | 15.86            |
| <b>Case 2</b>   |                     |               |              |                  |
|                 | gain 1p34.3         | 35106424      | 35228372     | 0.12             |
|                 | gain 1p14           | 70156025      | 70275477     | 0.12             |
|                 | loss 2q32.1         | 188942379     | 189076699    | 0.13             |
|                 | gain 3q21.3         | 131213377     | 131327230    | 0.11             |
|                 | gain 3q25.32        | 159758744     | 159865413    | 0.11             |
|                 | gain 3q27.1         | 184795403     | 184968811    | 0.17             |
|                 | gain 3q29           | 199232833     | 199380402    | 0.15             |
|                 | gain 7p21.3         | 11040165      | 11203172     | 0.16             |
|                 | gain 7p15.2         | 27081809      | 27213804     | 0.13             |
|                 | gain 7p12.3         | 47931639      | 48054390     | 0.12             |
|                 | gain 7q22.1         | 98389903      | 98512841     | 0.12             |
|                 | gain 8q24.3         | 141603380     | 141717824    | 0.11             |
|                 | gain 8q24.3         | 145924264     | 146099639    | 0.18             |
|                 | gain 10p15.3        | 62797         | 903825       | 0.84             |
|                 | loss 10q23.2-q23.32 | 89293858      | 94120662     | 4.83             |
|                 | gain 11q12.1-q23.3  | 57719840      | 119962965    | 62.24            |

|               |                          |           |           |        |
|---------------|--------------------------|-----------|-----------|--------|
|               | ampl 11q23.3             | 115475451 | 119962965 | 4.49   |
|               | loss 11q23.3-qter        | 119973847 | 134452384 | 14.48  |
|               | gain 12q24.33            | 131911167 | 132064588 | 0.15   |
|               | gain 13q31.3             | 90765745  | 91159861  | 0.39   |
|               | gain 14q32.33            | 105190672 | 105391419 | 0.20   |
|               | loss 14q32.33            | 105601397 | 105867261 | 0.27   |
|               | gain 14q32.33            | 106255229 | 106356482 | 0.10   |
|               | gain 15q15.2             | 41054903  | 41376506  | 0.32   |
|               | gain 18q21.2             | 49304445  | 51292535  | 1.99   |
| <b>Case 3</b> |                          |           |           |        |
|               | gain 1q32.1              | 201704327 | 202879427 | 1.18   |
|               | gain 3pter-q13.11        | 237715    | 105278073 | 105.04 |
|               | ampl 3q12.1-q13.11       | 99899652  | 105278073 | 5.38   |
|               | loss 3q13.11-q22.1       | 105545355 | 135653661 | 30.11  |
|               | gain 3q22.1-qter         | 135661150 | 199380402 | 63.72  |
|               | loss 6q14.3-q24.2        | 86506785  | 145521066 | 59.01  |
|               | gain 7p22.2              | 2375274   | 2757211   | 0.38   |
|               | loss 8q12.3-q13.2        | 63919515  | 69504641  | 5.59   |
|               | gain 10q24.32-q26.3      | 103736630 | 135356682 | 31.62  |
|               | loss 11p11.2             | 44661682  | 47027619  | 2.37   |
|               | loss 11q23.3-qter        | 120136046 | 134452384 | 14.31  |
|               | gain 14q32.33            | 105196431 | 106147535 | 0.95   |
|               | loss 15q15.3-q21.1       | 42638536  | 42851097  | 0.21   |
|               | gain 18q21.1-q23         | 43506879  | 76021279  | 32.51  |
|               | gain 22q12.2             | 29401354  | 30291713  | 0.89   |
|               | loss Xp22.33-qter        | 297864    | 153177486 | 152.88 |
| <b>Case 4</b> |                          |           |           |        |
|               | gain 11q13.1-q23.3       | 65143127  | 119833054 | 54.69  |
|               | loss 11q23.3-qter        | 119874121 | 134452384 | 14.58  |
| <b>Case 5</b> |                          |           |           |        |
|               | gain 7q34-qter           | 137991760 | 158811327 | 20.82  |
|               | gain 11q13.4-q24.1       | 72339170  | 123014463 | 50.67  |
|               | loss 11q24.1-qter        | 123021426 | 134445937 | 11.42  |
|               | gain 12 whole chromosome |           |           |        |
|               | loss 13q14.3-qter        | 52139320  | 114123908 | 61.98  |
|               | loss 17q24.3             | 65705035  | 66940878  | 1.24   |
| <b>Case 6</b> |                          |           |           |        |
|               | gain 11q13.1-q23.3       | 64641564  | 119519782 | 54.88  |
|               | ampl 11q23.3             | 115922770 | 119519782 | 3.60   |
|               | loss 11q23.3-qter        | 119538171 | 134452384 | 14.91  |
|               | gain 19pter-p13.2        | 231880    | 7573593   | 7.34   |
| <b>Case 7</b> |                          |           |           |        |

|                 |                          |           |            |        |
|-----------------|--------------------------|-----------|------------|--------|
|                 | gain 11q13.1-q24.1       | 63779666  | 121499506  | 57.72  |
|                 | loss 11q24.1-qter        | 121516192 | 134452384  | 12.94  |
|                 | gain 12 whole chromosome |           |            |        |
| <b>Case 8</b>   |                          |           |            |        |
|                 | gain 7q31.1-qter         | 113416517 | 1588214241 | 45.40  |
|                 | loss 9q21.11-q31.1       | 70196160  | 103751610  | 33.56  |
|                 | gain 11q12.1-q24.2       | 58680791  | 126956874  | 68.28  |
|                 | loss 11q24.2-qter        | 126977015 | 135006516  | 8.03   |
|                 | gain 12pter-p12.2        | 1         | 20891006   | 20.84  |
|                 | loss 12p12.2-p12.1       | 20891875  | 21307564   | 0.41   |
|                 | gain 12p12.1-qter        | 21445461  | 132289534  | 110.84 |
| <b>Case 9</b>   |                          |           |            |        |
|                 | loss 2q14.3-q31.1        | 127122505 | 170503003  | 43.38  |
|                 | gain 11q13.1-q23.3       | 66885327  | 120439037  | 53.37  |
|                 | ampl 11q14.3-q23.3       | 92942578  | 120439037  | 27.50  |
|                 | loss 11q23.3-qter        | 120445525 | 134452384  | 14.01  |
|                 | homoz loss 11q24.2-q24.3 | 127322011 | 128846569  | 1.52   |
| <b>Case 10</b>  |                          |           |            |        |
|                 | gain 10                  | 0         | 135374737  | 135.37 |
|                 | gain 11q12.1-q23.3       | 58553066  | 118931293  | 60.38  |
|                 | ampl 11q23.3             | 117107361 | 118883140  | 1.78   |
|                 | loss 11q23.3-qter        | 118941150 | 134452384  | 15.51  |
| <b>Case 11</b>  |                          |           |            |        |
|                 | loss 7p22.2-p22.1        | 4415401   | 6829674    | 2.41   |
|                 | loss 7q11.21-q11.22      | 61469275  | 68687083   | 7.22   |
|                 | loss 7q11.22 - q11.23    | 70246922  | 75936506   | 5.69   |
|                 | loss 7q21.3 - q22.3      | 94515368  | 105073913  | 10.56  |
|                 | gain 8q24.13 - q24.23    | 125040422 | 138214195  | 13.17  |
|                 | gain 11q13.1-q23.3       | 66430840  | 117939359  | 51.51  |
|                 | loss 11q23.3-qter        | 117999595 | 134452384  | 16.45  |
|                 | loss 19 whole chromosome |           |            |        |
| <b>Case 12</b>  |                          |           |            |        |
|                 | gain 11q12.1-q23.3       | 58608311  | 118452523  | 59.84  |
|                 | loss 11q23.3-q25         | 118452523 | 134452384  | 16.00  |
| <b>SU-DHL-5</b> |                          |           |            |        |
|                 | loss 1p36.32-p36.31      | 4371886   | 6440078    | 2.07   |
|                 | loss 3q13.31             | 117721944 | 118017064  | 0.30   |
|                 | loss 6pter-p22.1         | 94649     | 27222031   | 27.13  |
|                 | loss 6q13-qter           | 74812911  | 170824447  | 96.01  |
|                 | loss 11q23.2             | 114373214 | 114527878  | 0.15   |
|                 | gain 11q23.2-q23.3       | 114530818 | 117966632  | 3.44   |
|                 | loss 11q23.3-qter        | 117980123 | 134452384  | 16.47  |

|                 |                     |           |           |       |
|-----------------|---------------------|-----------|-----------|-------|
|                 | gain 12pter-q13.11  | 20691     | 46498049  | 46.48 |
|                 | gain 13q31.3        | 90128337  | 91984789  | 1.86  |
|                 | loss 16p13.3        | 3567612   | 4346884   | 0.78  |
|                 | gain 19pter-p13.2   | 41898     | 6181751   | 6.14  |
| <b>HT</b>       |                     |           |           |       |
|                 | loss 2p25.3-p24.1   | 0         | 22609737  | 22.6  |
|                 | loss 2p23.3         | 25767848  | 27139364  | 1.37  |
|                 | ampl 2p23.1         | 30621717  | 30833375  | 0.21  |
|                 | loss 2p23.1-p22.3   | 30836938  | 32537678  | 1.70  |
|                 | ampl 2p22.3         | 32541543  | 33682722  | 1.14  |
|                 | loss 2p22.3-p16.2   | 33687378  | 53916677  | 20.23 |
|                 | gain 2p16.2-16.1    | 53924856  | 55183842  | 1.26  |
|                 | loss 2p16.1-p15     | 55194316  | 61240592  | 6.04  |
|                 | ampl 2p15           | 61244295  | 61662952  | 0.42  |
|                 | loss 2p15-p12       | 62359975  | 83064902  | 20.70 |
|                 | loss 2q13-q24.1     | 111902315 | 155664643 | 43.76 |
|                 | loss 4pter-p12      | 0         | 48664347  | 48.66 |
|                 | gain 10q21.1-q22.2  | 55364108  | 75247849  | 19.88 |
|                 | ampl 11q14.3        | 88144006  | 89725365  | 1.58  |
|                 | ampl 11q21          | 93876132  | 95108752  | 1.23  |
|                 | ampl 11q22.1-q22.3  | 99835629  | 103320029 | 3.48  |
|                 | ampl 11q23.2        | 106152997 | 113742929 | 7.59  |
|                 | loss 11q23.2        | 113768098 | 114062057 | 0.29  |
|                 | ampl 11q23.2-q23.3  | 114068752 | 118677633 | 4.61  |
|                 | loss 11q23.3-qter   | 118679677 | 134452384 | 15.77 |
| <b>COHORT 3</b> |                     |           |           |       |
| <b>MPI-078</b>  |                     |           |           |       |
|                 | loss 6q14.1-q21     | 80482703  | 110738634 | 30.26 |
|                 | loss 9p22.3-p22.1   | 16388202  | 18522051  | 2.13  |
|                 | gain 11q22.1-q23.3  | 88473456  | 118296472 | 29.82 |
|                 | ampl11q23.3         | 117017708 | 118296472 | 1.28  |
|                 | loss 11q23.3-qter   | 118322247 | 134452384 | 16.13 |
|                 | gain 12pter-q13.11  | 152505    | 46627459  | 46.47 |
|                 | loss 13q31.3-qter   | 92499761  | 113932806 | 21.43 |
|                 | gain 14q11.2-q31.3  | 19570792  | 88183880  | 68.61 |
|                 | loss 14q32.12-qter  | 91389759  | 105139439 | 13.75 |
|                 | loss 15q11.2        | 18959894  | 20286790  | 1.33  |
|                 | gain 16p12.3-p11.2  | 18586418  | 30940331  | 12.35 |
|                 | loss Yp11.31-q11.23 | 2845473   | 26798441  | 23.95 |
| <b>MPI-086</b>  |                     |           |           |       |
|                 | loss 1p31.1         | 78953798  | 83496487  | 4.54  |

|                |                          |           |           |        |
|----------------|--------------------------|-----------|-----------|--------|
|                | gain 8 whole chromosome  |           |           |        |
|                | loss 9p22.2-p22.1        | 16995146  | 18522051  | 1.53   |
|                | loss 9p21.3-p21.2        | 21899259  | 25853240  | 3.95   |
|                | gain 11q22.1-q24.1       | 86049526  | 115060942 | 29.01  |
|                | loss 11q23-q23.3         | 115205059 | 115933496 | 0.73   |
|                | gain 11q23.3-q24.1       | 115933496 | 122263962 | 6.33   |
|                | loss 11q24.1-qter        | 122263962 | 134452384 | 12.19  |
|                | gain 12q13.11-q14.1      | 46569188  | 56455000  | 9.89   |
|                | gain 12q23.2-q24.32      | 101524012 | 124849229 | 23.33  |
|                | gain 19 whole chromosome |           |           |        |
|                | loss 20q13.2-q13.31      | 51561511  | 54897122  | 3.34   |
| <b>MPI-148</b> |                          |           |           |        |
|                | gain 11q12.2-q24.1       | 60068023  | 122862967 | 62.79  |
|                | loss 11q24.1-qter        | 122867926 | 134452384 | 11.58  |
| <b>MPI-315</b> |                          |           |           |        |
|                | gain 1q21.1-q21.3        | 143613589 | 153292828 | 9.68   |
|                | loss 1q32.1-qter         | 202748873 | 245280397 | 42.53  |
|                | loss 2pter-p16.1         | 2250133   | 60403212  | 58.15  |
|                | gain 2p16.1-p15          | 60403013  | 61380667  | 0.98   |
|                | loss 3q13.31-q21.2       | 117048246 | 127483269 | 10.44  |
|                | loss 4q12-q12            | 54654383  | 54825096  | 0.17   |
|                | loss 4q13.3-q33          | 74788409  | 172115114 | 97.33  |
|                | loss 5p15.32-p13.2       | 5500091   | 35078858  | 29.58  |
|                | gain 6pter-p25.2         | 352879    | 3427043   | 3.07   |
|                | loss 6p25.1-p22.3        | 5800622   | 20018591  | 14.22  |
|                | gain 6p22.3-p21.1        | 20523579  | 45164736  | 24.64  |
|                | loss 6p12.3-qter         | 46918395  | 170799954 | 123.88 |
|                | gain 7 whole chromosome  |           |           |        |
|                | loss 8p23.3-p11.21       | 20005607  | 42333716  | 22.33  |
|                | loss 9p24.1-p13.2        | 8398602   | 36897415  | 28.50  |
|                | gain 11q23.2-q23.3       | 115397542 | 118898368 | 3.50   |
|                | loss 11q23.3-qter        | 118950353 | 133706190 | 14.76  |
|                | gain 12q13.3-q13.3       | 50803968  | 52714396  | 1.91   |
|                | gain 12q22-q22           | 92645921  | 93711389  | 1.07   |
|                | loss 12q22-q24.1         | 94176856  | 113932806 | 19.76  |
|                | loss 15q11.2-qter        | 18959894  | 100036184 | 81.08  |
|                | loss 16pter-pter         | 266994    | 4851459   | 4.58   |
|                | loss 17pter-p11.2        | 343377    | 19021902  | 18.68  |
|                | loss 17q22-qter          | 52616469  | 78374826  | 25.76  |
|                | loss 18pter-p11.22       | 168384    | 9587352   | 9.42   |
|                | loss 22q11.21-qter       | 20261797  | 48869117  | 28.61  |
|                | gain Xq22.1-qter         | 98412392  | 154482340 | 56.07  |

|                            |                     |           |           |        |
|----------------------------|---------------------|-----------|-----------|--------|
| <b>MPI-382</b>             | gain Yp11.31-q11.23 | 2845473   | 26798441  | 23.95  |
|                            | gain 1q21.1-qter    | 143613589 | 245280397 | 101.67 |
|                            | loss 6q14.1-qter    | 80482703  | 170799900 | 90.32  |
|                            | gain 11q22.3-q24.2  | 104674037 | 125152144 | 20.48  |
|                            | loss 11q24.2-qter   | 126924590 | 133706190 | 6.78   |
|                            | gain 13q14.3-qter   | 50328519  | 113932806 | 63.60  |
|                            | loss 17pter-p11.2   | 343377    | 2023038   | 1.68   |
|                            | loss 18pter-p11.22  | 168384    | 10203413  | 10.04  |
|                            | loss 20q13.3-q13.2  | 48590356  | 49575686  | 0.99   |
|                            | gain Xp11.4-p11.1   | 41107931  | 57113775  | 16.01  |
| <b>MPI-626<sup>†</sup></b> | gain 2q33.1-33.1    | 200593235 | 201799587 | 1.21   |
|                            | loss 6q14.1-q22.2   | 80482703  | 118016198 | 37.53  |
|                            | gain 7q34-q35       | 140911726 | 143375452 | 2.46   |
|                            | gain 7q35-qter      | 146949516 | 157754947 | 10.81  |
|                            | gain 11q12.2-q14.1  | 59931009  | 78206821  | 18.28  |
|                            | gain 11q23.2-q23.3  | 114823728 | 119763552 | 4.94   |
|                            | loss 11q23.3-qter   | 119773351 | 133706190 | 13.93  |
|                            | gain 12q13.11-13.11 | 44606441  | 47291634  | 2.69   |
|                            | loss 13q33.3-qter   | 106527417 | 113932806 | 7.41   |
|                            | gain 18q12.3-q22.1  | 41216561  | 60139386  | 18.92  |
|                            | loss 18q22.1-qter   | 60417711  | 74870960  | 14.45  |

---

\*Annotation hg18/NCBI 36.1; <sup>†</sup>Case MPI-626 corresponds to case 1 from cohort 2.

**Supplemental Table 5.** Regions of gain/amplification and loss in chromosome 11q and minimal region according to hg18/NCBI 36.1 (cohort 2 and cohort 3)

| Analyzed using DNA Analytics/Genotyping Console/Nexus |                    |                  |                  | Analyzed using Nexus                         |                       |                  |                  |
|-------------------------------------------------------|--------------------|------------------|------------------|----------------------------------------------|-----------------------|------------------|------------------|
| Case                                                  | Alteration         | Start            | End              | Case                                         | Alteration            | Start            | End              |
| 1                                                     | gain 11q12.2-q23.3 | 59744929         | 119703938        | 1                                            | gain 11q12.1-q23.3    | 59689284         | 119681559        |
| 2                                                     | gain 11q12.1-q23.3 | 57743468         | 119935705        | 2                                            | gain 11q12.1-q23.3    | 57719840         | 119962965        |
| 2                                                     | ampl 11q23.3       | 115501782        | 119935705        | 2                                            | ampl 11q23.3          | 115475451        | 119962965        |
| 4                                                     | gain 11q13.4-q23.3 | 72233510         | 118474726        | 4                                            | gain 11q13.1-q23.3    | 65143127         | 119833054        |
| 5                                                     | gain 11q13.4-q24.1 | 72472183         | 122987191        | 5                                            | gain 11q13.4-q24.1    | 72339170         | 123014463        |
| 6                                                     | gain 11q13.1-q23.3 | 64320482         | 119515306        | 6                                            | gain 11q13.1-q23.3    | 64641564         | 119519782        |
| 6                                                     | ampl 11q23.3       | 115930770        | 119515306        | 6                                            | ampl 11q23.3          | 115922770        | 119519782        |
| 7                                                     | gain 11q13.3-q24.1 | 70490787         | 121042870        | 7                                            | gain 11q13.1-q24.1    | 63779666         | 121499506        |
| 8                                                     | gain 11q12.1-q24.2 | 58437367         | 126462084        | 8                                            | gain 11q12.1-q24.2    | 58680791         | 126956874        |
| 9                                                     | gain 11q13.1-q23.3 | 66841504         | 120212444        | 9                                            | gain 11q13.1-q23.3    | 66885327         | 120439037        |
| 9                                                     | ampl 11q14.3-q23.3 | 89390459         | 120212444        | 9                                            | ampl 11q21-q23.3      | 92942578         | 120439037        |
| 10                                                    | gain 11q12.1-q23.3 | 58686057         | 118931293        | 10                                           | gain 11q12.1-q23.3    | 58553066         | 118883140        |
| 10                                                    | ampl 11q23.3       | <b>117207811</b> | 118931293        | 10                                           | ampl 11q23.3          | <b>117107361</b> | 118883140        |
| 11                                                    | gain 11q13.1-q23.3 | 66537264         | <b>117930644</b> | 11                                           | gain 11q13.1-q23.3    | 66375228         | <b>117939359</b> |
| 12                                                    | gain 11q12.1-q23   | 58608311         | 118452523        | 12                                           | gain 11q12.1-q23      | 58608311         | 118452523        |
| <b>SU-DHL-5</b>                                       | gain 11q23.2-q23.3 | <b>114528073</b> | 117977645        | <b>SU-DHL-5</b>                              | gain 11q23.2-q23.3    | <b>114530818</b> | 117966632        |
| HT                                                    | ampl 11q14.3       | 88135598         | 89721310         | HT                                           | ampl 11q14.3          | 88144006         | 89725365         |
| HT                                                    | gain 11q21         | 93878519         | 95107104         | HT                                           | ampl 11q21            | 93876132         | 95108752         |
| HT                                                    | ampl 11q22.1-q22.3 | 99775174         | 103373313        | HT                                           | ampl 11q22.1-q22.3    | 99835629         | 103320029        |
| HT                                                    | gain 11q22.3-q23.2 | 106159402        | 113765153        | HT                                           | ampl 11q23.2          | 106152997        | 113742929        |
| HT                                                    | ampl 11q22.3-q23.2 | 107292911        | 113765153        |                                              |                       |                  |                  |
| HT                                                    | ampl 11q23.2-q23.3 | 114062136        | 118676746        | HT                                           | ampl 11q23.2-q23.3    | 114068752        | 118677633        |
| <b>MPI-078</b>                                        | gain 11q22.1-q23.3 | 100393958        | 118220300        | <b>MPI-078</b>                               | gain 11q14.3-q23.3    | 88473456         | 118296472        |
|                                                       |                    |                  |                  | <b>MPI-078</b>                               | ampl 11q23.3          | 117017708        | 118296472        |
| <b>MPI-086</b>                                        | gain 11q22.1-q24.1 | 100393958        | 122299458        | <b>MPI-086</b>                               | gain 11q14.2-q23.2    | 86049526         | 115060942        |
|                                                       |                    |                  |                  | <b>MPI-086</b>                               | gain 11q23.3-q24.1    | 115933496        | 122263962        |
| <b>MPI-148</b>                                        | gain 11q12.2-q14.1 | 61393968         | 78206821         | <b>MPI-148</b>                               | gain 11q12.2-q24.1    | 60068023         | 122862967        |
| <b>MPI-148</b>                                        | gain 11q23.3-q24.1 | 116204676        | 122299458        |                                              |                       |                  |                  |
| <b>MPI-315</b>                                        | gain 11q23.2-q23.3 | 115397542        | 118898368        | <b>MPI-315</b>                               | not analyzed by Nexus |                  |                  |
| <b>MPI-382</b>                                        | gain 11q22.3-q24.2 | 104674037        | 125152144        | <b>MPI-382</b>                               | not analyzed by Nexus |                  |                  |
| <b>MPI-626</b>                                        | gain 11q12.2-q14.1 | 59931009         | 78206821         | <b>MPI-626</b>                               | not analyzed by Nexus |                  |                  |
| <b>MPI-626</b>                                        | gain 11q23.2-q23.3 | 114823728        | 119763552        |                                              |                       |                  |                  |
| <b>Minimal region of gain/amplification</b>           |                    |                  |                  | <b>Minimal regions of gain/amplification</b> |                       |                  |                  |
|                                                       |                    | <b>Start</b>     | <b>End</b>       |                                              |                       | <b>Start</b>     | <b>End</b>       |
| <b>MR gain</b>                                        |                    | 114528073        | 117930644        | <b>MR gain</b>                               |                       | 114530818        | 117939359        |
| <b>MR ampl</b>                                        |                    | 117207811        | 117930644        | <b>MR ampl</b>                               |                       | 117107361        | 117939359        |



| Case                          | Alteration               | Start            | End              | Case                          | Alteration               | Start            | End              |
|-------------------------------|--------------------------|------------------|------------------|-------------------------------|--------------------------|------------------|------------------|
| 1                             | loss 11q23.3-qter        | 119710170        | 134449982        | 1                             | loss 11q23.3-qter        | 119707054        | 134452384        |
| 2                             | loss 11q23.3-qter        | 119940234        | <b>134324199</b> | 2                             | loss 11q23.3-qter        | 119973847        | 134452384        |
| 3                             | loss 11q23.3-qter        | 120642730        | 134335292        | 3                             | loss 11q23.3-qter        | 120136046        | 134452384        |
| 4                             | loss 11q23.3-qter        | 119882984        | 134432465        | 4                             | loss 11q23.3-qter        | 119874121        | 134452384        |
| 5                             | loss 11q24.1-qter        | 122999748        | 134432465        | 5                             | loss 11q24.1-qter        | 123021426        | <b>134445937</b> |
| 6                             | loss 11q23.3-qter        | 119524200        | 134432465        | 6                             | loss 11q23.3-qter        | 119538171        | 134452384        |
| 7                             | loss 11q24.1-qter        | 121083826        | 134432324        | 7                             | loss 11q24.1-qter        | 121516192        | 134452384        |
| 8                             | loss 11q24.2-qter        | <b>126482225</b> | 134451988        | 8                             | loss 11q24.2-qter        | <b>126977015</b> | 135006516        |
| 9                             | loss 11q23.3-qter        | 120445552        | 134451988        | 9                             | loss 11q23.3-qter        | 120445525        | 134452384        |
| 9                             | homoz loss 11q24.2-q24.3 | <b>127322011</b> | <b>128846569</b> | 9                             | homoz loss 11q24.2-q24.3 | <b>127322011</b> | <b>128846569</b> |
| 10                            | loss 11q23.3-qter        | 118936999        | 134431956        | 10                            | loss 11q23.3-qter        | 118941150        | 134452384        |
| 11                            | loss 11q23.3-qter        | 117956255        | 134451988        | 11                            | loss 11q23.3-qter        | 117999595        | 134452384        |
| 12                            | loss 11q23.3-qter        | 118452523        | 134451988        | 12                            | loss 11q23.3-qter        | 118452523        | 134452384        |
| <b>SU-DHL-5</b>               | loss 11q23.3             | 114376008        | 114527684        | <b>SU-DHL-5</b>               | loss 11q23.2             | 114373214        | 114527878        |
| <b>SU-DHL-5</b>               | loss 11q23.3-qter        | 117982577        | 134449982        | <b>SU-DHL-5</b>               | loss 11q23.3-qter        | 117980123        | 134452384        |
| <b>HT</b>                     | loss 11q23.2             | 113771043        | 114061954        | <b>HT</b>                     | loss 11q23.2             | 113768098        | 114062057        |
| <b>HT</b>                     | loss 11q23.3-qter        | 118681608        | 134449982        | <b>HT</b>                     | loss 11q23.3-qter        | 118679677        | 134452384        |
| <b>MPI-078</b>                | loss 11q23.3-qter        | 118258492        | 133706190        | <b>MPI-078</b>                | loss 11q23.3-qter        | 118322247        | 134452384        |
| <b>MPI-086</b>                | loss 11q24.1-qter        | 123265158        | 133706190        | <b>MPI-086</b>                | loss 11q23.2-q23.3       | 115205059        | 115933496        |
| <b>MPI-148</b>                | loss 11q24.1-qter        | 123265158        | 133706190        | <b>MPI-086</b>                | loss 11q24.1-qter        | 122263962        | 134452384        |
| <b>MPI-315</b>                | loss 11q23.3-qter        | 118950353        | 133706190        | <b>MPI-148</b>                | loss 11q24.1-qter        | 122867926        | 134452384        |
| <b>MPI-382</b>                | loss 11q24.2-qter        | 126924590        | 133706190        | <b>MPI-315</b>                | not analyzed by nexus    |                  |                  |
| <b>MPI-626</b>                | loss 11q23.3-qter        | 119773351        | 133706190        | <b>MPI-382</b>                | not analyzed by nexus    |                  |                  |
| <b>MPI-626</b>                | loss 11q23.3-qter        | 119773351        | 133706190        | <b>MPI-626</b>                | not analyzed by nexus    |                  |                  |
| <b>Minimal region of loss</b> |                          |                  |                  | <b>Minimal region of loss</b> |                          |                  |                  |
|                               |                          | <b>Start</b>     | <b>End</b>       |                               |                          | <b>Start</b>     | <b>End</b>       |
| <b>MR loss</b>                |                          | 126482225        | 134324199        | <b>MR loss</b>                |                          | 126977015        | 134445937        |
| <b>MR homoz loss</b>          |                          | 127322011        | 128846569        | <b>MR homoz loss</b>          |                          | 127322011        | 128846569        |

ampl: amplification; homoz loss: homozygous loss; MR: minimal region. Bold positions delineate minimal regions of gain and loss.

**Supplemental Table 6.** Comparison of immunohistochemical and genetic features between cases with 11q gain-loss pattern (cohort 3) (n=6) and *IG-MYC* mBL (n=46) and DLBCL (n=198). 11q samples and DLBCL controls were compared by Fishers exact test.

|                    | <i>IG-MYC</i> positive mBL<br>n=46 | 11q <i>MYC</i> -negative<br>n=6 | DLBCL<br>n=198 | <i>P</i> -value<br>(11q vs<br>DLBCL) |
|--------------------|------------------------------------|---------------------------------|----------------|--------------------------------------|
| <b>Gender</b>      | n (%)                              |                                 |                |                                      |
| Female             | 11(24%)                            | 1(17%)                          | 89(45%)        |                                      |
| Male               | 35(76%)                            | 5(83%)                          | 108(55%)       |                                      |
| <b>CD20</b>        |                                    |                                 |                |                                      |
| Neg                | 0                                  | 1(17%)                          | 11(6%)         |                                      |
| Pos                | 46(100%)                           | 5(83%)                          | 186(94%)       |                                      |
| <b>CD10</b>        |                                    |                                 |                |                                      |
| Neg                | 1(2%)                              | 1(17%)                          | 133(69%)       |                                      |
| Pos                | 43(98%)                            | <b>5(83%)</b>                   | <b>59(31%)</b> | <i>P</i> =.014                       |
| <b>CD5</b>         |                                    |                                 |                |                                      |
| Neg                | 41(93%)                            | 5(100%)                         | 158(86%)       |                                      |
| Pos                | 3(7%)                              | 0(0%)                           | 25(14%)        |                                      |
| <b>BCL2</b>        |                                    |                                 |                |                                      |
| Neg                | 37(86%)                            | <b>4(80%)</b>                   | <b>33(17%)</b> | <i>P</i> =.005                       |
| Pos                | 6(14%)                             | 1(20%)                          | 157(83%)       |                                      |
| <b>BCL2INT</b>     |                                    |                                 |                |                                      |
| 0                  | 34(81%)                            | <b>4(80%)</b>                   | <b>20(11%)</b> | <i>P</i> <.001                       |
| 1                  | 6(14%)                             | 1(20%)                          | 65(35%)        |                                      |
| 2                  | 1(2%)                              | 0(0%)                           | 71(38%)        |                                      |
| 3                  | 1(2%)                              | 0(0%)                           | 30(16%)        |                                      |
| <b>BCL6</b>        |                                    |                                 |                |                                      |
| Neg                | 2(5%)                              | 0(0%)                           | 39(21%)        |                                      |
| Pos                | 41(95%)                            | 6(100%)                         | 147(79%)       |                                      |
| <b>MUM1</b>        |                                    |                                 |                |                                      |
| Neg                | 23(56%)                            | 3(60%)                          | 53(28%)        |                                      |
| Pos                | 18(44%)                            | 2(40%)                          | 133(72%)       |                                      |
| <b>HLADR</b>       |                                    |                                 |                |                                      |
| Neg                | 10(24%)                            | 2(40%)                          | 30(17%)        |                                      |
| Pos                | 31(66%)                            | 3(60%)                          | 151(76%)       |                                      |
| <b>KI67</b>        |                                    |                                 |                |                                      |
| Low (<90)          | 3(7%)                              | 1(17%)                          | 145(76%)       |                                      |
| High (>90)         | 42(93%)                            | <b>5(83%)</b>                   | <b>47(24%)</b> | <i>P</i> =.005                       |
| <b>MYC status</b>  |                                    |                                 |                |                                      |
| <i>IG-MYC</i>      | <b>46(100%)</b>                    | <b>0(0%)</b>                    | 6(3%)          |                                      |
| Neg                | 0(0%)                              | 6(100%)                         | 179(90%)       |                                      |
| non- <i>IG-MYC</i> |                                    |                                 | 13(7%)         |                                      |
| <b>t(14;18)</b>    |                                    |                                 |                |                                      |
| Neg                | 45(98%)                            | 6(100%)                         | 175(88%)       |                                      |
| Pos                | 1(2%)                              | 0(0%)                           | 23(12%)        |                                      |
| <b>BCL6 break</b>  |                                    |                                 |                |                                      |
| Neg                | 45(98%)                            | 6(100%)                         | 151(78%)       |                                      |
| Pos                | 0(0%)                              | 0(0%)                           | 43(22%)        |                                      |
| <b>MALT1 break</b> |                                    |                                 |                |                                      |
| Neg                | 45(100%)                           | 5(100%)                         | 188(99%)       |                                      |
| Pos                |                                    |                                 | 1(1%)          |                                      |
| <b>IGH break</b>   |                                    |                                 |                |                                      |

|                            |                 |                |                |                |
|----------------------------|-----------------|----------------|----------------|----------------|
| Neg                        | 2(4%)           | 4(67%)         | 117(62%)       |                |
| Pos                        | 44(96%)         | 2(33%)         | 73(38%)        |                |
| <b>GEP</b>                 |                 |                |                |                |
| <b>GCB/ABC</b>             |                 |                |                |                |
| ABC                        | 0(0%)           | 0(0%)          | 61(31%)        |                |
| GCB                        | 41(89%)         | <b>6(100%)</b> | <b>88(44%)</b> | <i>P</i> =.04  |
| unclassified               | 5(11%)          | 0(0%)          | 49(25%)        |                |
| <b>Molecular diagnosis</b> |                 |                |                |                |
| intermediate               | 0(0%)           | 3(50%)         | 29(15%)        |                |
| mBL                        | <b>46(100%)</b> | <b>3(50%)</b>  | 0(0%)          | <i>P</i> <.001 |
| non-mBL                    | 0(0%)           | 0(0%)          | 169(85%)       |                |
| <b>COMAP</b>               |                 |                |                |                |
| BL-PAP                     | <b>46(100%)</b> | <b>3(50%)</b>  | <b>0(0%)</b>   | <i>P</i> <.001 |
| mind-L                     | 0(0%)           | 2(33%)         | 43(22%)        |                |
| PAP-1                      | 0(0%)           | 1(17%)         | 84(42%)        |                |
| PAP-2                      | 0(0%)           | 0(0%)          | 23(12%)        |                |
| PAP-3                      | 0(0%)           | 0(0%)          | 26(13%)        |                |
| PAP-4                      | 0(0%)           | 0(0%)          | 22(11%)        |                |

---

The scoring for BCL2 intensity (int) is as follows: 1=weaker than T-cells, 2=equal than T-cells, 3= stronger than T-cells.

**Supplemental Table 7.** Differentially expressed genes between cases with 11q-gain/loss pattern (cohort 3) (n=6) and *IG-MYC* mBL (n=46)

| <b>Differentially expressed genes in the 11q minimal region of gain between cases with 11q-gain/loss pattern and <i>IG-MYC</i> BL</b> |                 |                                                                            |              |                  |                               |                 |
|---------------------------------------------------------------------------------------------------------------------------------------|-----------------|----------------------------------------------------------------------------|--------------|------------------|-------------------------------|-----------------|
| <b>affy_hg_u133a</b>                                                                                                                  | <b>symbol</b>   | <b>description</b>                                                         | <b>logFC</b> | <b>adj.P.Val</b> | <b>gene expression status</b> | <b>Chr Band</b> |
| 204912_at                                                                                                                             | <i>IL10RA</i>   | interleukin 10 receptor, alpha                                             | 1,678075     | 5,51E-09         | upReg_in_11q                  | 11q23           |
| 200054_at                                                                                                                             | <i>ZNF259</i>   | zinc finger protein 259                                                    | 0,527004     | 6,01E-06         | upReg_in_11q                  | 11q23.3         |
| 210160_at                                                                                                                             | <i>PAFAH1B2</i> | platelet-activating factor acetylhydrolase 1b, catalytic subunit 2 (30kDa) | 0,356262     | 3,77E-05         | upReg_in_11q                  | 11q23           |
| 204251_s_at                                                                                                                           | <i>CEP164</i>   | centrosomal protein 164kDa                                                 | 0,307823     | 0,005803         | upReg_in_11q                  | 11q23.3         |
| 56256_at                                                                                                                              | <i>SIDT2</i>    | SID1 transmembrane family, member 2                                        | 0,507588     | 0,034517         | upReg_in_11q                  | 11q23.3         |
| 218765_at                                                                                                                             | <i>SIDT2</i>    | SID1 transmembrane family, member 2                                        | 0,285941     | 0,040985         | upReg_in_11q                  | 11q23.3         |
| <b>Differentially expressed genes in the 11q minimal region of loss between cases with 11q-gain/loss pattern and <i>IG-MYC</i> BL</b> |                 |                                                                            |              |                  |                               |                 |
| <b>affy_hg_u133a</b>                                                                                                                  | <b>symbol</b>   | <b>description</b>                                                         | <b>logFC</b> | <b>adj.P.Val</b> | <b>gene expression status</b> | <b>Chr Band</b> |
| 204236_at                                                                                                                             | <i>FLI1</i>     | Friend leukemia virus integration 1                                        | -0,94562     | 1,12E-05         | downReg_in_11q                | 11q24.3         |
| 208703_s_at                                                                                                                           | <i>APLP2</i>    | amyloid beta (A4) precursor-like protein 2                                 | -0,99233     | 8,07E-05         | downReg_in_11q                | 11q24           |
| 208248_x_at                                                                                                                           | <i>APLP2</i>    | amyloid beta (A4) precursor-like protein 2                                 | -0,85109     | 9,35E-05         | downReg_in_11q                | 11q24           |
| 208704_x_at                                                                                                                           | <i>APLP2</i>    | amyloid beta (A4) precursor-like protein 2                                 | -0,80842     | 9,35E-05         | downReg_in_11q                | 11q24           |
| 218491_s_at                                                                                                                           | <i>THYN1</i>    | thymocyte nuclear protein 1                                                | -0,62595     | 0,000474         | downReg_in_11q                | 11q25           |
| 221669_s_at                                                                                                                           | <i>ACAD8</i>    | acyl-CoA dehydrogenase family, member 8                                    | -0,49925     | 0,001474         | downReg_in_11q                | 11q25           |
| 212789_at                                                                                                                             | <i>NCAPD3</i>   | non-SMC condensin II complex, subunit D3                                   | -0,51814     | 0,001519         | downReg_in_11q                | 11q25           |
| 213028_at                                                                                                                             | <i>NFRKB</i>    | nuclear factor related to kappaB binding protein                           | -0,24125     | 0,001533         | downReg_in_11q                | 11q25           |
| 210786_s_at                                                                                                                           | <i>FLI1</i>     | Friend leukemia virus integration 1                                        | -0,77575     | 0,002557         | downReg_in_11q                | 11q24.3         |
| 202359_s_at                                                                                                                           | <i>SNX19</i>    | sorting nexin 19                                                           | -0,27369     | 0,006075         | downReg_in_11q                | 11q25           |
| 216905_s_at                                                                                                                           | <i>ST14</i>     | suppression of tumorigenicity 14 (colon carcinoma)                         | -0,66041     | 0,006449         | downReg_in_11q                | 11q25           |
| 206968_s_at                                                                                                                           | <i>NFRKB</i>    | nuclear factor related to kappaB binding protein                           | -0,34033     | 0,006665         | downReg_in_11q                | 11q24.3         |
| 208702_x_at                                                                                                                           | <i>APLP2</i>    | amyloid beta (A4) precursor-like protein 2                                 | -0,69365     | 0,007253         | downReg_in_11q                | 11q24           |
| 219515_at                                                                                                                             | <i>PRDM10</i>   | PR domain containing 10                                                    | -1,13288     | 0,013345         | downReg_in_11q                | 11q25           |
| 214875_x_at                                                                                                                           | <i>APLP2</i>    | amyloid beta (A4) precursor-like protein 2                                 | -0,67563     | 0,013626         | downReg_in_11q                | 11q24           |
| 211404_s_at                                                                                                                           | <i>APLP2</i>    | amyloid beta (A4) precursor-like protein 2                                 | -0,61154     | 0,020152         | downReg_in_11q                | 11q24           |
| 202005_at                                                                                                                             | <i>ST14</i>     | suppression of tumorigenicity 14 (colon carcinoma)                         | -0,52252     | 0,029694         | downReg_in_11q                | 11q24.3         |
| 202358_s_at                                                                                                                           | <i>SNX19</i>    | sorting nexin 19                                                           | -0,21391     | 0,047999         | downReg_in_11q                | 11q25           |
| <b>Differentially expressed genes at 11q between cases with 11q-gain/loss pattern and <i>IG-MYC</i> BL</b>                            |                 |                                                                            |              |                  |                               |                 |
| <b>affy_hg_u133a</b>                                                                                                                  | <b>symbol</b>   | <b>description</b>                                                         | <b>logFC</b> | <b>adj.P.Val</b> | <b>gene expression status</b> | <b>Chr Band</b> |
| 204912_at                                                                                                                             | <i>IL10RA</i>   | interleukin 10 receptor, alpha                                             | 1,678075     | 5,51E-09         | upReg_in_11q                  | 11q23           |
| 213343_s_at                                                                                                                           | <i>GDPD5</i>    | glycerophosphodiester phosphodiesterase domain containing 5                | 0,688361     | 1,23E-07         | upReg_in_11q                  | 11q13.4         |
| 217841_s_at                                                                                                                           | <i>PPME1</i>    | protein phosphatase methylesterase 1                                       | 0,444862     | 2,24E-07         | upReg_in_11q                  | 11q13.4         |
| 202038_at                                                                                                                             | <i>UBE4A</i>    | ubiquitination factor E4A (UFD2 homolog, yeast)                            | 0,797761     | 7,37E-07         | upReg_in_11q                  | 11q23.3         |
| 212906_at                                                                                                                             | <i>GRAMD1B</i>  | GRAM domain containing 1B                                                  | 0,506668     | 8,24E-07         | upReg_in_11q                  | 11q24.1         |
| 32502_at                                                                                                                              | <i>GDPD5</i>    | glycerophosphodiester phosphodiesterase domain containing 5                | 0,765595     | 9,07E-07         | upReg_in_11q                  | 11q13.4         |
| 200054_at                                                                                                                             | <i>ZNF259</i>   | zinc finger protein 259                                                    | 0,527004     | 6,01E-06         | upReg_in_11q                  | 11q23.3         |
| 217958_at                                                                                                                             | <i>TRAPPC4</i>  | trafficking protein particle complex 4                                     | 0,890066     | 6,23E-06         | upReg_in_11q                  | 11q23.3         |
| 201059_at                                                                                                                             | <i>CTTN</i>     | cortactin                                                                  | 0,736431     | 1,01E-05         | upReg_in_11q                  | 11q13           |
| 204236_at                                                                                                                             | <i>FLI1</i>     | Friend leukemia virus integration 1                                        | -0,94562     | 1,12E-05         | downReg_in_11q                | 11q24.3         |
| 49077_at                                                                                                                              | <i>PPME1</i>    | protein phosphatase methylesterase 1                                       | 0,325646     | 1,28E-05         | upReg_in_11q                  | 11q13.4         |
| 201176_s_at                                                                                                                           | <i>ARCN1</i>    | archain 1                                                                  | 0,841908     | 1,37E-05         | upReg_in_11q                  | 11q23.3         |
| 214073_at                                                                                                                             | <i>CTTN</i>     | cortactin                                                                  | 0,366337     | 1,37E-05         | upReg_in_11q                  | 11q13           |
| 214369_s_at                                                                                                                           | <i>RASGRP2</i>  | RAS guanyl releasing protein 2 (calcium and DAG-regulated)                 | -1,0788      | 2,11E-05         | downReg_in_11q                | 11q13           |
| 218531_at                                                                                                                             | <i>TMEM134</i>  | transmembrane protein 134                                                  | 0,605611     | 2,88E-05         | upReg_in_11q                  | 11q13.2         |
| 214724_at                                                                                                                             | <i>DIXDC1</i>   | DIX domain containing 1                                                    | 0,673977     | 3,41E-05         | upReg_in_11q                  | 11q23.1         |
| 219304_s_at                                                                                                                           | <i>PDGFD</i>    | platelet derived growth factor D                                           | 1,115638     | 3,58E-05         | upReg_in_11q                  | 11q22.3         |
| 210160_at                                                                                                                             | <i>PAFAH1B2</i> | platelet-activating factor acetylhydrolase 1b, catalytic subunit 2 (30kDa) | 0,356262     | 3,77E-05         | upReg_in_11q                  | 11q23           |
| 217959_s_at                                                                                                                           | <i>TRAPPC4</i>  | trafficking protein particle complex 4                                     | 0,807668     | 5,56E-05         | upReg_in_11q                  | 11q23.3         |
| 207213_s_at                                                                                                                           | <i>USP2</i>     | ubiquitin specific peptidase 2                                             | 1,013707     | 5,71E-05         | upReg_in_11q                  | 11q23.3         |
| 209572_s_at                                                                                                                           | <i>EED</i>      | embryonic ectoderm development                                             | 0,810704     | 6,09E-05         | upReg_in_11q                  | 11q14.2         |

|             |                |                                                                                                               |          |          |                |         |
|-------------|----------------|---------------------------------------------------------------------------------------------------------------|----------|----------|----------------|---------|
| 208206_s_at | <i>RASGRP2</i> | RAS guanyl releasing protein 2 (calcium and DAG-regulated)                                                    | -0,93394 | 8,07E-05 | downReg_in_11q | 11q13   |
| 208703_s_at | <i>APLP2</i>   | amyloid beta (A4) precursor-like protein 2                                                                    | -0,99233 | 8,07E-05 | downReg_in_11q | 11q24   |
| 207573_x_at | <i>ATP5L</i>   | ATP synthase, H+ transporting, mitochondrial Fo complex, subunit G                                            | 0,667454 | 9,35E-05 | upReg_in_11q   | 11q23.3 |
| 208248_x_at | <i>APLP2</i>   | amyloid beta (A4) precursor-like protein 2                                                                    | -0,85109 | 9,35E-05 | downReg_in_11q | 11q24   |
| 208704_x_at | <i>APLP2</i>   | amyloid beta (A4) precursor-like protein 2                                                                    | -0,80842 | 9,35E-05 | downReg_in_11q | 11q24   |
| 218774_at   | <i>DCPS</i>    | decapping enzyme, scavenger                                                                                   | -0,65704 | 9,35E-05 | downReg_in_11q | 11q24.2 |
| 208746_x_at | <i>ATP5L</i>   | ATP synthase, H+ transporting, mitochondrial Fo complex, subunit G                                            | 0,681039 | 0,00024  | upReg_in_11q   | 11q23.3 |
| 209509_s_at | <i>DPAGT1</i>  | dolichyl-phosphate (UDP-N-acetylglucosamine) N-acetylglucosaminephosphotransferase 1 (GlcNAc-1-P transferase) | 0,505537 | 0,00024  | upReg_in_11q   | 11q23.3 |
| 210453_x_at | <i>ATP5L</i>   | ATP synthase, H+ transporting, mitochondrial Fo complex, subunit G                                            | 0,661902 | 0,000444 | upReg_in_11q   | 11q23.3 |
| 218491_s_at | <i>THYN1</i>   | thymocyte nuclear protein 1                                                                                   | -0,62595 | 0,000474 | downReg_in_11q | 11q25   |
| 222209_s_at | <i>TMEM135</i> | transmembrane protein 135                                                                                     | 1,013816 | 0,000502 | upReg_in_11q   | 11q14.2 |
| 203494_s_at | <i>CEP57</i>   | centrosomal protein 57kDa                                                                                     | 0,531437 | 0,000558 | upReg_in_11q   | 11q21   |
| 209798_at   | <i>NPAT</i>    | nuclear protein, ataxia-telangiectasia locus                                                                  | 0,495181 | 0,000813 | upReg_in_11q   | 11q22.3 |
| 221669_s_at | <i>ACAD8</i>   | acyl-CoA dehydrogenase family, member 8                                                                       | -0,49925 | 0,001474 | downReg_in_11q | 11q25   |
| 212789_at   | <i>NCAPD3</i>  | non-SMC condensin II complex, subunit D3                                                                      | -0,51814 | 0,001519 | downReg_in_11q | 11q25   |
| 213028_at   | <i>NFRKB</i>   | nuclear factor related to kappaB binding protein                                                              | -0,24125 | 0,001533 | downReg_in_11q | 11q24.3 |
| 204327_s_at | <i>ZNF202</i>  | zinc finger protein 202                                                                                       | -0,35395 | 0,001587 | downReg_in_11q | 11q23.3 |
| 206530_at   | <i>RAB30</i>   | RAB30, member RAS oncogene family                                                                             | 0,38094  | 0,001746 | upReg_in_11q   | 11q14.1 |
| 203330_s_at | <i>STX5</i>    | syntaxin 5                                                                                                    | 0,264077 | 0,001913 | upReg_in_11q   | 11q12.3 |
| 219053_s_at | <i>VPS37C</i>  | vacuolar protein sorting 37 homolog C (S. cerevisiae)                                                         | 0,313245 | 0,0023   | upReg_in_11q   | 11q12.2 |
| 210786_s_at | <i>FLI1</i>    | Friend leukemia virus integration 1                                                                           | -0,77575 | 0,002557 | downReg_in_11q | 11q24.3 |
| 202996_at   | <i>POLD4</i>   | polymerase (DNA-directed), delta 4                                                                            | 0,798108 | 0,004118 | upReg_in_11q   | 11q13   |
| 209694_at   | <i>PTS</i>     | 6-pyruvoyltetrahydropterin synthase                                                                           | 0,747131 | 0,004316 | upReg_in_11q   | 11q22.3 |
| 212506_at   | <i>PICALM</i>  | phosphatidylinositol binding clathrin assembly protein                                                        | 0,415084 | 0,005442 | upReg_in_11q   | 11q14   |
| 204251_s_at | <i>CEP164</i>  | centrosomal protein 164kDa                                                                                    | 0,307823 | 0,005803 | upReg_in_11q   | 11q23.3 |
| 201494_at   | <i>PRCP</i>    | prolylcarboxypeptidase (angiotensinase C)                                                                     | 0,467707 | 0,005821 | upReg_in_11q   | 11q14   |
| 202359_s_at | <i>SNX19</i>   | sorting nexin 19                                                                                              | -0,27369 | 0,006075 | downReg_in_11q | 11q25   |
| 212568_s_at | <i>DLAT</i>    | dihydrolipoamide S-acetyltransferase                                                                          | 0,653693 | 0,006245 | upReg_in_11q   | 11q23.1 |
| 216905_s_at | <i>ST14</i>    | suppression of tumorigenicity 14 (colon carcinoma)                                                            | -0,66041 | 0,006449 | downReg_in_11q | 11q24.3 |
| 206968_s_at | <i>NFRKB</i>   | nuclear factor related to kappaB binding protein                                                              | -0,34033 | 0,006665 | downReg_in_11q | 11q24.3 |
| 218483_s_at | <i>IFT46</i>   | intraflagellar transport 46 homolog (Chlamydomonas)                                                           | 0,350362 | 0,006707 | upReg_in_11q   | 11q23.3 |
| 203391_at   | <i>FKBP2</i>   | FK506 binding protein 2, 13kDa                                                                                | 0,335952 | 0,006804 | upReg_in_11q   | 11q13.1 |
| 202076_at   | <i>BIRC2</i>   | baculoviral IAP repeat containing 2                                                                           | 0,431788 | 0,007051 | upReg_in_11q   | 11q22   |
| 208702_x_at | <i>APLP2</i>   | amyloid beta (A4) precursor-like protein 2                                                                    | -0,69365 | 0,007253 | downReg_in_11q | 11q24   |
| 34206_at    | <i>ARAP1</i>   | ArfGAP with RhoGAP domain, ankyrin repeat and PH domain 1                                                     | 0,317264 | 0,007366 | upReg_in_11q   | 11q13.4 |
| 210538_s_at | <i>BIRC3</i>   | baculoviral IAP repeat containing 3                                                                           | 1,110038 | 0,007493 | upReg_in_11q   | 11q22   |
| 216250_s_at | <i>LPXN</i>    | leupaxin                                                                                                      | 0,610693 | 0,007722 | upReg_in_11q   | 11q12.1 |
| 201119_s_at | <i>COX8A</i>   | cytochrome c oxidase subunit VIIIA (ubiquitous)                                                               | 0,445603 | 0,008009 | upReg_in_11q   | 11q13.1 |
| 203491_s_at | <i>CEP57</i>   | centrosomal protein 57kDa                                                                                     | 0,518688 | 0,008215 | upReg_in_11q   | 11q21   |
| 1861_at     | <i>BAD</i>     | BCL2-associated agonist of cell death                                                                         | 0,282945 | 0,008511 | upReg_in_11q   | 11q13.1 |
| 204757_s_at | <i>C2CD2L</i>  | C2CD2-like                                                                                                    | 0,216491 | 0,01     | upReg_in_11q   | 11q23.3 |
| 216615_s_at | <i>HTR3A</i>   | 5-hydroxytryptamine (serotonin) receptor 3A                                                                   | 0,351571 | 0,010081 | upReg_in_11q   | 11q23.1 |
| 218357_s_at | <i>TIMM8B</i>  | translocase of inner mitochondrial membrane 8 homolog B (yeast)                                               | 0,579248 | 0,010347 | upReg_in_11q   | 11q23.1 |
| 213149_at   | <i>DLAT</i>    | dihydrolipoamide S-acetyltransferase                                                                          | 0,555759 | 0,010535 | upReg_in_11q   | 11q23.1 |
| 219515_at   | <i>PRDM10</i>  | PR domain containing 10                                                                                       | -1,13288 | 0,013345 | downReg_in_11q | 11q25   |
| 204329_s_at | <i>ZNF202</i>  | zinc finger protein 202                                                                                       | -0,1852  | 0,013414 | downReg_in_11q | 11q23.3 |
| 214211_at   | <i>FTH1</i>    | ferritin, heavy polypeptide 1                                                                                 | 0,598449 | 0,013606 | upReg_in_11q   | 11q13   |
| 214875_x_at | <i>APLP2</i>   | amyloid beta (A4) precursor-like protein 2                                                                    | -0,67563 | 0,013626 | downReg_in_11q | 11q24   |
| 205395_s_at | <i>MRE11A</i>  | MRE11 meiotic recombination 11 homolog A (S. cerevisiae)                                                      | 0,380975 | 0,014142 | upReg_in_11q   | 11q21   |

|             |                 |                                                                                                              |          |          |                |         |
|-------------|-----------------|--------------------------------------------------------------------------------------------------------------|----------|----------|----------------|---------|
| 203252_at   | <i>CDK2AP2</i>  | cyclin-dependent kinase 2 associated protein 2                                                               | 0,578801 | 0,014145 | upReg_in_11q   | 11q13   |
| 209364_at   | <i>BAD</i>      | BCL2-associated agonist of cell death                                                                        | 0,299575 | 0,014521 | upReg_in_11q   | 11q13.1 |
| 203620_s_at | <i>FCHSD2</i>   | FCH and double SH3 domains 2                                                                                 | -0,5122  | 0,014803 | downReg_in_11q | 11q13.4 |
| 208289_s_at | <i>EI24</i>     | etoposide induced 2.4 mRNA                                                                                   | -0,3896  | 0,015367 | downReg_in_11q | 11q24   |
| 218314_s_at | <i>C11orf57</i> | chromosome 11 open reading frame 57                                                                          | 0,288811 | 0,015399 | upReg_in_11q   | 11q23.1 |
| 220964_s_at | <i>RAB1B</i>    | RAB1B, member RAS oncogene family myeloid/lymphoid or mixed-lineage leukemia (trithorax homolog, Drosophila) | 0,265311 | 0,015707 | upReg_in_11q   | 11q12   |
| 212080_at   | <i>MLL</i>      |                                                                                                              | 0,440896 | 0,015933 | upReg_in_11q   | 11q23   |
| 209428_s_at | <i>ZFPL1</i>    | zinc finger protein-like 1                                                                                   | 0,189295 | 0,017234 | upReg_in_11q   | 11q13   |
| 219806_s_at | <i>C11orf75</i> | chromosome 11 open reading frame 75                                                                          | 0,644553 | 0,017642 | upReg_in_11q   | 11q21   |
| 200748_s_at | <i>FTH1</i>     | ferritin, heavy polypeptide 1                                                                                | 0,565409 | 0,017656 | upReg_in_11q   | 11q13   |
| 219021_at   | <i>RNF121</i>   | ring finger protein 121                                                                                      | 0,208214 | 0,019922 | upReg_in_11q   | 11q13.4 |
| 211404_s_at | <i>APLP2</i>    | amyloid beta (A4) precursor-like protein 2                                                                   | -0,61154 | 0,020152 | downReg_in_11q | 11q24   |
| 208745_at   | <i>ATP5L</i>    | ATP synthase, H+ transporting, mitochondrial Fo complex, subunit G                                           | 0,452209 | 0,020371 | upReg_in_11q   | 11q23.3 |
| 217418_x_at | <i>MS4A1</i>    | membrane-spanning 4-domains, subfamily A, member 1                                                           | -0,9361  | 0,022052 | downReg_in_11q | 11q12   |
| 210356_x_at | <i>MS4A1</i>    | membrane-spanning 4-domains, subfamily A, member 1                                                           | -0,94168 | 0,022471 | downReg_in_11q | 11q12   |
| 220934_s_at | <i>TMEM223</i>  | transmembrane protein 223                                                                                    | 0,325398 | 0,024934 | upReg_in_11q   | 11q12.3 |
| 214657_s_at | <i>NEAT1</i>    | nuclear paraspeckle assembly transcript 1 (non-protein coding)                                               | 0,383265 | 0,02784  | upReg_in_11q   | 11q13.1 |
| 200846_s_at | <i>PPP1CA</i>   | protein phosphatase 1, catalytic subunit, alpha isozyme                                                      | 0,428579 | 0,0292   | upReg_in_11q   | 11q13   |
| 202005_at   | <i>ST14</i>     | suppression of tumorigenicity 14 (colon carcinoma)                                                           | -0,52252 | 0,029694 | downReg_in_11q | 11q24.3 |
| 210656_at   | <i>EED</i>      | embryonic ectoderm development                                                                               | 0,450205 | 0,029694 | upReg_in_11q   | 11q14.2 |
| 203040_s_at | <i>HMBS</i>     | hydroxymethylbilane synthase                                                                                 | 0,395019 | 0,030187 | upReg_in_11q   | 11q23.3 |
| 212516_at   | <i>ARAP1</i>    | ArfGAP with RhoGAP domain, ankyrin repeat and PH domain 1                                                    | 0,275375 | 0,030918 | upReg_in_11q   | 11q13.4 |
| 214251_s_at | <i>NUMA1</i>    | nuclear mitotic apparatus protein 1                                                                          | -0,6312  | 0,032008 | downReg_in_11q | 11q13   |
| 56256_at    | <i>SIDT2</i>    | SID1 transmembrane family, member 2                                                                          | 0,507588 | 0,034517 | upReg_in_11q   | 11q23.3 |
| 214074_s_at | <i>CTTN</i>     | cortactin                                                                                                    | 0,177746 | 0,03607  | upReg_in_11q   | 11q13   |
| 203532_x_at | <i>CUL5</i>     | cullin 5                                                                                                     | 0,235816 | 0,036078 | upReg_in_11q   | 11q22.3 |
| 205436_s_at | <i>H2AFX</i>    | H2A histone family, member X                                                                                 | 0,54258  | 0,037799 | upReg_in_11q   | 11q23.3 |
| 217002_s_at | <i>HTR3A</i>    | 5-hydroxytryptamine (serotonin) receptor 3A leucine rich repeat and fibronectin type III domain containing 4 | 0,275376 | 0,037823 | upReg_in_11q   | 11q23.1 |
| 219491_at   | <i>LRFN4</i>    |                                                                                                              | -0,60122 | 0,03893  | downReg_in_11q | 11q13.2 |
| 211150_s_at | <i>DLAT</i>     | dihydrolipoamide S-acetyltransferase                                                                         | 0,568386 | 0,040695 | upReg_in_11q   | 11q23.1 |
| 218765_at   | <i>SIDT2</i>    | SID1 transmembrane family, member 2                                                                          | 0,285941 | 0,040985 | upReg_in_11q   | 11q23.3 |
| 216624_s_at | <i>MLL</i>      | myeloid/lymphoid or mixed-lineage leukemia (trithorax homolog, Drosophila)                                   | 0,238159 | 0,043089 | upReg_in_11q   | 11q23   |
| 202358_s_at | <i>SNX19</i>    | sorting nexin 19                                                                                             | -0,21391 | 0,047999 | downReg_in_11q | 11q25   |
| 209581_at   | <i>PLA2G16</i>  | phospholipase A2, group XVI                                                                                  | 0,371652 | 0,049396 | upReg_in_11q   | 11q12.3 |
| 217774_s_at | <i>TRMT112</i>  | tRNA methyltransferase 11-2 homolog (S. cerevisiae)                                                          | 0,364092 | 0,049559 | upReg_in_11q   | 11q13.1 |
| 204164_at   | <i>SIPA1</i>    | signal-induced proliferation-associated 1                                                                    | 0,357053 | 0,049819 | upReg_in_11q   | 11q13   |

logFC: log fold change; adj.P.Val: adjusted p-value; downReg: downregulated; upReg: upregulated

**Supplemental Table 8.** Differentially expressed genes between cases with 11q-gain/loss pattern(cohort 3) (n=6) and DLBCL (n=198)

| <b>Differentially expressed genes in the 11q minimal region of gain between cases with 11q-gain/loss pattern and DLBCL</b> |                 |                                                                            |           |           |                        |          |
|----------------------------------------------------------------------------------------------------------------------------|-----------------|----------------------------------------------------------------------------|-----------|-----------|------------------------|----------|
| affy_hg_u133a                                                                                                              | symbol          | description                                                                | logFC     | adj.P.Val | gene expression status | Chr Band |
| 210160_at                                                                                                                  | <i>PAFAH1B2</i> | platelet-activating factor acetylhydrolase 1b, catalytic subunit 2 (30kDa) | 0,3549459 | 3,47E-05  | upReg_in_11q           | 11q23    |
| 200054_at                                                                                                                  | <i>ZNF259</i>   | zinc finger protein 259                                                    | 0,6010693 | 6,65E-05  | upReg_in_11q           | 11q23.3  |
| 204251_s_at                                                                                                                | <i>CEP164</i>   | centrosomal protein 164kDa                                                 | 0,3548958 | 0,0001943 | upReg_in_11q           | 11q23.3  |
| <b>Differentially expressed genes in the 11q minimal region of loss between cases with 11q-gain/loss pattern and DLBCL</b> |                 |                                                                            |           |           |                        |          |
| affy_hg_u133a                                                                                                              | symbol          | description                                                                | logFC     | adj.P.Val | gene expression status | Chr Band |
| 221669_s_at                                                                                                                | <i>ACAD8</i>    | acyl-CoA dehydrogenase family, member 8                                    | -0,602787 | 4,07E-05  | downReg_in_11q         | 11q25    |
| 204236_at                                                                                                                  | <i>FLI1</i>     | Friend leukemia virus integration 1                                        | -0,942324 | 0,0007944 | downReg_in_11q         | 11q24.3  |
| 219515_at                                                                                                                  | <i>PRDM10</i>   | PR domain containing 10                                                    | 0,4111526 | 0,0031113 | upReg_in_11q           | 11q25    |
| 218491_s_at                                                                                                                | <i>THYN1</i>    | thymocyte nuclear protein 1                                                | -0,584312 | 0,0062082 | downReg_in_11q         | 11q25    |
| 202359_s_at                                                                                                                | <i>SNX19</i>    | sorting nexin 19                                                           | -0,319848 | 0,0116245 | downReg_in_11q         | 11q25    |
| 202358_s_at                                                                                                                | <i>SNX19</i>    | sorting nexin 19                                                           | -0,277251 | 0,0117535 | downReg_in_11q         | 11q25    |
| 210786_s_at                                                                                                                | <i>FLI1</i>     | Friend leukemia virus integration 1                                        | -0,689029 | 0,0150662 | downReg_in_11q         | 11q24.3  |
| 220677_s_at                                                                                                                | <i>ADAMTS8</i>  | ADAM metalloproteinase with thrombospondin type 1 motif, 8                 | -0,152753 | 0,0494953 | downReg_in_11q         | 11q25    |
| <b>Differentially expressed genes at 11q between cases with 11q-gain/loss pattern and DLBCL</b>                            |                 |                                                                            |           |           |                        |          |
| affy_hg_u133a                                                                                                              | symbol          | description                                                                | logFC     | adj.P.Val | gene expression status | Chr Band |
| 207213_s_at                                                                                                                | <i>USP2</i>     | ubiquitin specific peptidase 2                                             | 0,9782071 | 1,75E-12  | upReg_in_11q           | 11q23.3  |
| 205412_at                                                                                                                  | <i>ACAT1</i>    | acetyl-CoA acetyltransferase 1                                             | 1,2478204 | 3,53E-09  | upReg_in_11q           | 11q22.3  |
| 207573_x_at                                                                                                                | <i>ATP5L</i>    | ATP synthase, H+ transporting, mitochondrial Fo complex, subunit G         | 0,9815732 | 5,59E-09  | upReg_in_11q           | 11q23.3  |
| 208746_x_at                                                                                                                | <i>ATP5L</i>    | ATP synthase, H+ transporting, mitochondrial Fo complex, subunit G         | 1,0297151 | 1,05E-08  | upReg_in_11q           | 11q23.3  |
| 210453_x_at                                                                                                                | <i>ATP5L</i>    | ATP synthase, H+ transporting, mitochondrial Fo complex, subunit G         | 0,9972158 | 1,37E-08  | upReg_in_11q           | 11q23.3  |
| 203040_s_at                                                                                                                | <i>HMBS</i>     | hydroxymethylbilane synthase                                               | 0,8000295 | 5,95E-08  | upReg_in_11q           | 11q23.3  |
| 204266_s_at                                                                                                                | <i>CHKA</i>     | choline kinase alpha                                                       | 0,6064674 | 1,40E-07  | upReg_in_11q           | 11q13.2  |
| 218281_at                                                                                                                  | <i>MRPL48</i>   | mitochondrial ribosomal protein L48                                        | 0,7914415 | 2,57E-06  | upReg_in_11q           | 11q13.4  |
| 222209_s_at                                                                                                                | <i>TMEM135</i>  | transmembrane protein 135                                                  | 0,9954209 | 5,62E-06  | upReg_in_11q           | 11q14.2  |
| 209310_s_at                                                                                                                | <i>CASP4</i>    | caspase 4, apoptosis-related cysteine peptidase                            | -0,900248 | 1,12E-05  | downReg_in_11q         | 11q22.3  |
| 208745_at                                                                                                                  | <i>ATP5L</i>    | ATP synthase, H+ transporting, mitochondrial Fo complex, subunit G         | 0,737387  | 1,21E-05  | upReg_in_11q           | 11q23.3  |
| 211150_s_at                                                                                                                | <i>DLAT</i>     | dihydrolipoamide S-acetyltransferase                                       | 0,94146   | 1,25E-05  | upReg_in_11q           | 11q23.1  |
| 218314_s_at                                                                                                                | <i>C11orf57</i> | chromosome 11 open reading frame 57                                        | 0,5146329 | 1,55E-05  | upReg_in_11q           | 11q23.1  |
| 218483_s_at                                                                                                                | <i>IFT46</i>    | intraflagellar transport 46 homolog (Chlamydomonas)                        | 0,4791343 | 2,62E-05  | upReg_in_11q           | 11q23.3  |
| 205449_at                                                                                                                  | <i>SAC3D1</i>   | SAC3 domain containing 1                                                   | 0,9570918 | 3,06E-05  | upReg_in_11q           | 11q13.1  |
| 218357_s_at                                                                                                                | <i>TIMM8B</i>   | translocase of inner mitochondrial membrane 8 homolog B (yeast)            | 0,8751176 | 3,07E-05  | upReg_in_11q           | 11q23.1  |
| 210160_at                                                                                                                  | <i>PAFAH1B2</i> | platelet-activating factor acetylhydrolase 1b, catalytic subunit 2 (30kDa) | 0,3549459 | 3,47E-05  | upReg_in_11q           | 11q23    |
| 221669_s_at                                                                                                                | <i>ACAD8</i>    | acyl-CoA dehydrogenase family, member 8                                    | -0,602787 | 4,07E-05  | downReg_in_11q         | 11q25    |
| 200054_at                                                                                                                  | <i>ZNF259</i>   | zinc finger protein 259                                                    | 0,6010693 | 6,65E-05  | upReg_in_11q           | 11q23.3  |
| 209694_at                                                                                                                  | <i>PTS</i>      | 6-pyruvoyltetrahydropterin synthase                                        | 0,9481615 | 7,58E-05  | upReg_in_11q           | 11q22.3  |
| 212568_s_at                                                                                                                | <i>DLAT</i>     | dihydrolipoamide S-acetyltransferase                                       | 0,9515238 | 0,0001165 | upReg_in_11q           | 11q23.1  |
| 217958_at                                                                                                                  | <i>TRAPPC4</i>  | trafficking protein particle complex 4                                     | 0,7829267 | 0,0001208 | upReg_in_11q           | 11q23.3  |
| 204251_s_at                                                                                                                | <i>CEP164</i>   | centrosomal protein 164kDa                                                 | 0,3548958 | 0,0001943 | upReg_in_11q           | 11q23.3  |
| 220934_s_at                                                                                                                | <i>TMEM223</i>  | transmembrane protein 223                                                  | 0,429785  | 0,0003356 | upReg_in_11q           | 11q12.3  |
| 204441_s_at                                                                                                                | <i>POLA2</i>    | polymerase (DNA directed), alpha 2 (70kD subunit)                          | 0,5943025 | 0,0003477 | upReg_in_11q           | 11q13.1  |
| 204233_s_at                                                                                                                | <i>CHKA</i>     | choline kinase alpha                                                       | 0,5190812 | 0,0003966 | upReg_in_11q           | 11q13.2  |
| 214724_at                                                                                                                  | <i>DIXDC1</i>   | DIX domain containing 1                                                    | 0,5618571 | 0,0003994 | upReg_in_11q           | 11q23.1  |
| 202038_at                                                                                                                  | <i>UBE4A</i>    | ubiquitination factor E4A (UFD2 homolog, yeast)                            | 0,6837696 | 0,0005622 | upReg_in_11q           | 11q23.3  |

|             |                 |                                                                                                                                                        |           |           |                |         |
|-------------|-----------------|--------------------------------------------------------------------------------------------------------------------------------------------------------|-----------|-----------|----------------|---------|
| 213149_at   | <i>DLAT</i>     | dihydrolipoamide S-acetyltransferase<br>tRNA methyltransferase 11-2 homolog (S. cerevisiae)                                                            | 0,7956132 | 0,0007382 | upReg_in_11q   | 11q23.1 |
| 217774_s_at | <i>TRMT112</i>  |                                                                                                                                                        | 0,662946  | 0,0007466 | upReg_in_11q   | 11q13.1 |
| 204236_at   | <i>FLI1</i>     | Friend leukemia virus integration 1                                                                                                                    | -0,942324 | 0,0007944 | downReg_in_11q | 11q24.3 |
| 202170_s_at | <i>AASDHPPT</i> | aminoadipate-semialdehyde dehydrogenase-phosphopantetheinyl transferase                                                                                | 0,6202666 | 0,0008132 | upReg_in_11q   | 11q22   |
| 203103_s_at | <i>PRPF19</i>   | PRP19/PSO4 pre-mRNA processing factor 19 homolog (S. cerevisiae)                                                                                       | 0,5934282 | 0,0009286 | upReg_in_11q   | 11q12.2 |
| 217866_at   | <i>CPSF7</i>    | cleavage and polyadenylation specific factor 7, 59kDa                                                                                                  | 0,4739024 | 0,0009613 | upReg_in_11q   | 11q12.2 |
| 200957_s_at | <i>SSRP1</i>    | structure specific recognition protein 1                                                                                                               | 0,6256101 | 0,0011505 | upReg_in_11q   | 11q12   |
| 201119_s_at | <i>COX8A</i>    | cytochrome c oxidase subunit VIIIa (ubiquitous)                                                                                                        | 0,554285  | 0,001162  | upReg_in_11q   | 11q13.1 |
| 217841_s_at | <i>PPME1</i>    | protein phosphatase methylesterase 1                                                                                                                   | 0,3831073 | 0,0012401 | upReg_in_11q   | 11q13.4 |
| 202306_at   | <i>POLR2G</i>   | polymerase (RNA) II (DNA directed) polypeptide G                                                                                                       | 0,6241404 | 0,0012498 | upReg_in_11q   | 11q13.1 |
| 204218_at   | <i>C11orf51</i> | chromosome 11 open reading frame 51                                                                                                                    | 0,4460535 | 0,0012687 | upReg_in_11q   | 11q13.4 |
| 221712_s_at | <i>WDR74</i>    | WD repeat domain 74                                                                                                                                    | 0,4779026 | 0,0012687 | upReg_in_11q   | 11q12.3 |
| 213330_s_at | <i>STIP1</i>    | stress-induced-phosphoprotein 1                                                                                                                        | 0,6279378 | 0,0014284 | upReg_in_11q   | 11q13   |
| 219769_at   | <i>INCENP</i>   | inner centromere protein antigens 135/155kDa                                                                                                           | 0,3002023 | 0,001461  | upReg_in_11q   | 11q12.3 |
| 212076_at   | <i>MLL</i>      | myeloid/lymphoid or mixed-lineage leukemia (trithorax homolog, Drosophila)                                                                             | 0,4436059 | 0,0018087 | upReg_in_11q   | 11q23   |
| 205395_s_at | <i>MRE11A</i>   | MRE11 meiotic recombination 11 homolog A (S. cerevisiae)                                                                                               | 0,6067197 | 0,0018587 | upReg_in_11q   | 11q21   |
| 217959_s_at | <i>TRAPPC4</i>  | trafficking protein particle complex 4                                                                                                                 | 0,6957569 | 0,0021022 | upReg_in_11q   | 11q23.3 |
| 210356_x_at | <i>MS4A1</i>    | membrane-spanning 4-domains, subfamily A, member 1                                                                                                     | -1,288255 | 0,0021938 | downReg_in_11q | 11q12   |
| 217418_x_at | <i>MS4A1</i>    | membrane-spanning 4-domains, subfamily A, member 1                                                                                                     | -1,264078 | 0,0023069 | downReg_in_11q | 11q12   |
| 202065_s_at | <i>PPFIA1</i>   | protein tyrosine phosphatase, receptor type, f polypeptide (PTPRF), interacting protein (liprin), alpha 1                                              | 0,2399142 | 0,0023772 | upReg_in_11q   | 11q13.3 |
| 209032_s_at | <i>CADM1</i>    | cell adhesion molecule 1                                                                                                                               | 0,7988333 | 0,0026265 | upReg_in_11q   | 11q23.2 |
| 49077_at    | <i>PPME1</i>    | protein phosphatase methylesterase 1                                                                                                                   | 0,3329125 | 0,002796  | upReg_in_11q   | 11q13.4 |
| 204757_s_at | <i>C2CD2L</i>   | C2CD2-like                                                                                                                                             | 0,2190684 | 0,0028128 | upReg_in_11q   | 11q23.3 |
| 204767_s_at | <i>FEN1</i>     | flap structure-specific endonuclease 1                                                                                                                 | 0,7986502 | 0,0028455 | upReg_in_11q   | 11q12   |
| 219515_at   | <i>PRDM10</i>   | PR domain containing 10                                                                                                                                | 0,4111526 | 0,0031113 | upReg_in_11q   | 11q25   |
| 201176_s_at | <i>ARCN1</i>    | archain 1                                                                                                                                              | 0,5765224 | 0,0033718 | upReg_in_11q   | 11q23.3 |
| 218734_at   | <i>NAA40</i>    | N(alpha)-acetyltransferase 40, NatD catalytic subunit, homolog (S. cerevisiae)                                                                         | 0,365137  | 0,0040586 | upReg_in_11q   | 11q13.1 |
| 200918_s_at | <i>SRPR</i>     | signal recognition particle receptor (docking protein)                                                                                                 | -0,557199 | 0,004249  | downReg_in_11q | 11q24.2 |
| 212080_at   | <i>MLL</i>      | myeloid/lymphoid or mixed-lineage leukemia (trithorax homolog, Drosophila)                                                                             | 0,456507  | 0,004249  | upReg_in_11q   | 11q23   |
| 219162_s_at | <i>MRPL11</i>   | mitochondrial ribosomal protein L11                                                                                                                    | 0,5186287 | 0,0042961 | upReg_in_11q   | 11q13.3 |
| 211986_at   | <i>AHNAK</i>    | AHNAK nucleoprotein                                                                                                                                    | -0,910851 | 0,0043516 | downReg_in_11q | 11q12.2 |
| 212397_at   | <i>RDX</i>      | radixin                                                                                                                                                | -0,886068 | 0,0043808 | downReg_in_11q | 11q23   |
| 205436_s_at | <i>H2AFX</i>    | H2A histone family, member X                                                                                                                           | 0,8504199 | 0,0044803 | upReg_in_11q   | 11q23.3 |
| 208619_at   | <i>DDB1</i>     | damage-specific DNA binding protein 1, 127kDa                                                                                                          | 0,4281291 | 0,0047419 | upReg_in_11q   | 11q12.2 |
| 209798_at   | <i>NPAT</i>     | nuclear protein, ataxia-telangiectasia locus protein tyrosine phosphatase, receptor type, f polypeptide (PTPRF), interacting protein (liprin), alpha 1 | 0,4925735 | 0,0049464 | upReg_in_11q   | 11q22.3 |
| 210236_at   | <i>PPFIA1</i>   |                                                                                                                                                        | 0,278476  | 0,0053127 | upReg_in_11q   | 11q13.3 |
| 203491_s_at | <i>CEP57</i>    | centrosomal protein 57kDa                                                                                                                              | 0,6608241 | 0,0059996 | upReg_in_11q   | 11q21   |
| 218491_s_at | <i>THYN1</i>    | thymocyte nuclear protein 1                                                                                                                            | -0,584312 | 0,0062082 | downReg_in_11q | 11q25   |
| 217980_s_at | <i>MRPL16</i>   | mitochondrial ribosomal protein L16                                                                                                                    | 0,4996882 | 0,0062715 | upReg_in_11q   | 11q12.1 |
| 216624_s_at | <i>MLL</i>      | myeloid/lymphoid or mixed-lineage leukemia (trithorax homolog, Drosophila)                                                                             | 0,2662181 | 0,0069172 | upReg_in_11q   | 11q23   |
| 218774_at   | <i>DCPS</i>     | decapping enzyme, scavenger                                                                                                                            | -0,509863 | 0,0071109 | downReg_in_11q | 11q24.2 |
| 204768_s_at | <i>FEN1</i>     | flap structure-specific endonuclease 1                                                                                                                 | 0,7525314 | 0,0077506 | upReg_in_11q   | 11q12   |
| 221818_at   | <i>INTS5</i>    | integrator complex subunit 5                                                                                                                           | 0,295263  | 0,0084659 | upReg_in_11q   | 11q12.3 |
| 221580_s_at | <i>TAF1D</i>    | TATA box binding protein (TBP)-associated factor, RNA polymerase I, D, 41kDa                                                                           | 0,6899697 | 0,0085511 | upReg_in_11q   | 11q21   |
| 202645_s_at | <i>MEN1</i>     | multiple endocrine neoplasia I                                                                                                                         | 0,439182  | 0,0086418 | upReg_in_11q   | 11q13   |



|             |                 |                                                                                                           |           |           |                |         |
|-------------|-----------------|-----------------------------------------------------------------------------------------------------------|-----------|-----------|----------------|---------|
| 220613_s_at | <i>SYTL2</i>    | synaptotagmin-like 2                                                                                      | 0,2965953 | 0,0091833 | upReg_in_11q   | 11q14   |
| 204812_at   | <i>ZW10</i>     | ZW10, kinetochore associated, homolog (Drosophila)                                                        | 0,294103  | 0,0094026 | upReg_in_11q   | 11q23.2 |
| 204977_at   | <i>DDX10</i>    | DEAD (Asp-Glu-Ala-Asp) box polypeptide 10                                                                 | 0,455369  | 0,0097333 | upReg_in_11q   | 11q22.3 |
| 212525_s_at | <i>H2AFX</i>    | H2A histone family, member X                                                                              | 0,5503475 | 0,0100177 | upReg_in_11q   | 11q23.3 |
| 200956_s_at | <i>SSRP1</i>    | structure specific recognition protein 1                                                                  | 0,6316079 | 0,0109471 | upReg_in_11q   | 11q12   |
| 220998_s_at | <i>UNC93B1</i>  | unc-93 homolog B1 (C. elegans)                                                                            | -0,340523 | 0,0110751 | downReg_in_11q | 11q13   |
| 202359_s_at | <i>SNX19</i>    | sorting nexin 19                                                                                          | -0,319848 | 0,0116245 | downReg_in_11q | 11q25   |
| 202358_s_at | <i>SNX19</i>    | sorting nexin 19                                                                                          | -0,277251 | 0,0117535 | downReg_in_11q | 11q25   |
| 202883_s_at | <i>PPP2R1B</i>  | protein phosphatase 2, regulatory subunit A, beta                                                         | 0,5078317 | 0,0122387 | upReg_in_11q   | 11q23.2 |
| 212680_x_at | <i>PPP1R14B</i> | protein phosphatase 1, regulatory (inhibitor) subunit 14B                                                 | 0,6687539 | 0,0129027 | upReg_in_11q   | 11q13   |
| 222369_at   | <i>NAA40</i>    | N(alpha)-acetyltransferase 40, NatD catalytic subunit, homolog (S. cerevisiae)                            | 0,5182417 | 0,0135619 | upReg_in_11q   | 11q13.1 |
| 203494_s_at | <i>CEP57</i>    | centrosomal protein 57kDa                                                                                 | 0,4972319 | 0,0137427 | upReg_in_11q   | 11q21   |
| 203190_at   | <i>NDUFS8</i>   | NADH dehydrogenase (ubiquinone) Fe-S protein 8, 23kDa (NADH-coenzyme Q reductase)                         | 0,5311954 | 0,0139541 | upReg_in_11q   | 11q13   |
| 204828_at   | <i>RAD9A</i>    | RAD9 homolog A (S. pombe)                                                                                 | 0,2119539 | 0,0141123 | upReg_in_11q   | 11q13.2 |
| 53968_at    | <i>INTS5</i>    | integrator complex subunit 5                                                                              | 0,3620342 | 0,014615  | upReg_in_11q   | 11q12.3 |
| 210786_s_at | <i>FLI1</i>     | Friend leukemia virus integration 1                                                                       | -0,689029 | 0,0150662 | downReg_in_11q | 11q24.3 |
| 209572_s_at | <i>EED</i>      | embryonic ectoderm development                                                                            | 0,701465  | 0,0153376 | upReg_in_11q   | 11q14.2 |
| 211042_x_at | <i>MCAM</i>     | melanoma cell adhesion molecule                                                                           | 0,4593377 | 0,0160341 | upReg_in_11q   | 11q23.3 |
| 202886_s_at | <i>PPP2R1B</i>  | protein phosphatase 2, regulatory subunit A, beta                                                         | 0,5394457 | 0,01658   | upReg_in_11q   | 11q23.2 |
| 214074_s_at | <i>CTTN</i>     | cortactin                                                                                                 | 0,1667822 | 0,0166839 | upReg_in_11q   | 11q13   |
| 203119_at   | <i>CCDC86</i>   | coiled-coil domain containing 86                                                                          | 0,4950085 | 0,0189621 | upReg_in_11q   | 11q12.2 |
| 218906_x_at | <i>KLC2</i>     | kinesin light chain 2                                                                                     | 0,2888295 | 0,0195307 | upReg_in_11q   | 11q13.2 |
| 218566_s_at | <i>CHORDC1</i>  | cysteine and histidine-rich domain (CHORD) containing 1                                                   | 0,6585327 | 0,0203891 | upReg_in_11q   | 11q14.3 |
| 208714_at   | <i>NDUFV1</i>   | NADH dehydrogenase (ubiquinone) flavoprotein 1, 51kDa                                                     | 0,4862397 | 0,0210139 | upReg_in_11q   | 11q13   |
| 200846_s_at | <i>PPP1CA</i>   | protein phosphatase 1, catalytic subunit, alpha isozyyme                                                  | 0,4665403 | 0,0217548 | upReg_in_11q   | 11q13   |
| 209970_x_at | <i>CASP1</i>    | caspase 1, apoptosis-related cysteine peptidase (interleukin 1, beta, convertase)                         | -0,741733 | 0,0218502 | downReg_in_11q | 11q23   |
| 204178_s_at | <i>RBM14</i>    | RNA binding motif protein 14                                                                              | 0,405609  | 0,0230713 | upReg_in_11q   | 11q13.2 |
| 205267_at   | <i>POU2AF1</i>  | POU class 2 associating factor 1                                                                          | 0,8399652 | 0,0236727 | upReg_in_11q   | 11q23.1 |
| 208712_at   | <i>CCND1</i>    | cyclin D1                                                                                                 | -0,498926 | 0,0241934 | downReg_in_11q | 11q13   |
| 212078_s_at | <i>MLL</i>      | myeloid/lymphoid or mixed-lineage leukemia (trithorax homolog, Drosophila)                                | 0,2568695 | 0,0251639 | upReg_in_11q   | 11q23   |
| 209892_at   | <i>FUT4</i>     | fucosyltransferase 4 (alpha (1,3) fucosyltransferase, myeloid-specific)                                   | -0,370716 | 0,0263634 | downReg_in_11q | 11q21   |
| 32502_at    | <i>GDPD5</i>    | glycerophosphodiester phosphodiesterase domain containing 5                                               | 0,5406836 | 0,0268002 | upReg_in_11q   | 11q13.4 |
| 210125_s_at | <i>BANF1</i>    | barrier to autointegration factor 1                                                                       | 0,5516835 | 0,0271706 | upReg_in_11q   | 11q13.1 |
| 212573_at   | <i>ENDOD1</i>   | endonuclease domain containing 1                                                                          | 0,4988896 | 0,0290231 | upReg_in_11q   | 11q21   |
| 204969_s_at | <i>RDX</i>      | radixin                                                                                                   | -0,384763 | 0,0295712 | downReg_in_11q | 11q23   |
| 203189_s_at | <i>NDUFS8</i>   | NADH dehydrogenase (ubiquinone) Fe-S protein 8, 23kDa (NADH-coenzyme Q reductase)                         | 0,4661644 | 0,0300055 | upReg_in_11q   | 11q13   |
| 218531_at   | <i>TMEM134</i>  | transmembrane protein 134                                                                                 | 0,4318852 | 0,0303758 | upReg_in_11q   | 11q13.2 |
| 211367_s_at | <i>CASP1</i>    | caspase 1, apoptosis-related cysteine peptidase (interleukin 1, beta, convertase)                         | -0,806784 | 0,0312463 | downReg_in_11q | 11q23   |
| 218194_at   | <i>REXO2</i>    | REX2, RNA exonuclease 2 homolog (S. cerevisiae)                                                           | 0,5793743 | 0,0314286 | upReg_in_11q   | 11q23.2 |
| 212079_s_at | <i>MLL</i>      | myeloid/lymphoid or mixed-lineage leukemia (trithorax homolog, Drosophila)                                | 0,3532438 | 0,0328347 | upReg_in_11q   | 11q23   |
| 203853_s_at | <i>GAB2</i>     | GRB2-associated binding protein 2                                                                         | -0,43939  | 0,0343981 | downReg_in_11q | 11q14.1 |
| 210235_s_at | <i>PPFIA1</i>   | protein tyrosine phosphatase, receptor type, f polypeptide (PTPRF), interacting protein (liprin), alpha 1 | 0,2600899 | 0,0344788 | upReg_in_11q   | 11q13.3 |
| 206495_s_at | <i>HINFP</i>    | histone H4 transcription factor                                                                           | 0,2077073 | 0,0350076 | upReg_in_11q   | 11q23.3 |
| 205011_at   | <i>VWA5A</i>    | von Willebrand factor A domain containing 5A                                                              | -0,284003 | 0,0358018 | downReg_in_11q | 11q24.1 |
| 214789_x_at | <i>SRSF8</i>    | serine/arginine-rich splicing factor 8                                                                    | 0,3094599 | 0,0361384 | upReg_in_11q   | 11q22   |
| 200091_s_at | <i>RPS25</i>    | ribosomal protein S25                                                                                     | 0,4548306 | 0,0371266 | upReg_in_11q   | 11q23.3 |

|             |                 |                                                                                                             |           |           |                |         |
|-------------|-----------------|-------------------------------------------------------------------------------------------------------------|-----------|-----------|----------------|---------|
| 214073_at   | <i>CTTN</i>     | cortactin                                                                                                   | 0,1964462 | 0,0372901 | upReg_in_11q   | 11q13   |
| 200986_at   | <i>SERPING1</i> | serpin peptidase inhibitor, clade G (C1 inhibitor), member 1                                                | -1,092758 | 0,0374944 | downReg_in_11q | 11q12.1 |
| 212398_at   | <i>RDX</i>      | radixin                                                                                                     | -0,538168 | 0,0380011 | downReg_in_11q | 11q23   |
| 200019_s_at | <i>FAU</i>      | Finkel-Biskis-Reilly murine sarcoma virus (FBR-MuSV) ubiquitously expressed                                 | 0,4888132 | 0,0381046 | upReg_in_11q   | 11q13   |
| 206011_at   | <i>CASP1</i>    | caspace 1, apoptosis-related cysteine peptidase (interleukin 1, beta, convertase)                           | -0,586665 | 0,0408942 | downReg_in_11q | 11q23   |
| 49111_at    | <i>ARRB1</i>    | arrestin, beta 1                                                                                            | -0,213388 | 0,0408942 | downReg_in_11q | 11q13   |
| 209862_s_at | <i>CEP57</i>    | centrosomal protein 57kDa                                                                                   | 0,4338938 | 0,0411261 | upReg_in_11q   | 11q21   |
| 202978_s_at | <i>CREBZF</i>   | CREB/ATF bZIP transcription factor phosphatidylinositol binding clathrin assembly protein                   | 0,391999  | 0,042303  | upReg_in_11q   | 11q14   |
| 203134_at   | <i>PICALM</i>   | protein                                                                                                     | 0,2562355 | 0,0423501 | upReg_in_11q   | 11q14   |
| 210102_at   | <i>VWA5A</i>    | von Willebrand factor A domain containing 5A translocase of inner mitochondrial membrane 10 homolog (yeast) | -0,28035  | 0,0423501 | downReg_in_11q | 11q24.1 |
| 218408_at   | <i>TIMM10</i>   | homolog (yeast)                                                                                             | 0,4226004 | 0,0445603 | upReg_in_11q   | 11q12.1 |
| 200619_at   | <i>SF3B2</i>    | splicing factor 3b, subunit 2, 145kDa                                                                       | 0,331762  | 0,044694  | upReg_in_11q   | 11q13.1 |
| 209030_s_at | <i>CADM1</i>    | cell adhesion molecule 1                                                                                    | 0,924763  | 0,0455815 | upReg_in_11q   | 11q23.2 |
| 221277_s_at | <i>PUS3</i>     | pseudouridylate synthase 3                                                                                  | -0,285858 | 0,0466813 | downReg_in_11q | 11q24.2 |
| 221637_s_at | <i>C11orf48</i> | chromosome 11 open reading frame 48                                                                         | 0,4580805 | 0,0469024 | upReg_in_11q   | 11q12.3 |
| 211366_x_at | <i>CASP1</i>    | caspace 1, apoptosis-related cysteine peptidase (interleukin 1, beta, convertase)                           | -0,653807 | 0,0476959 | downReg_in_11q | 11q23   |
| 211368_s_at | <i>CASP1</i>    | caspace 1, apoptosis-related cysteine peptidase (interleukin 1, beta, convertase)                           | -0,750575 | 0,0482096 | downReg_in_11q | 11q23   |
| 221622_s_at | <i>TMEM126B</i> | transmembrane protein 126B                                                                                  | 0,4878169 | 0,0484394 | upReg_in_11q   | 11q14.1 |
| 220677_s_at | <i>ADAMTS8</i>  | ADAM metallopeptidase with thrombospondin type 1 motif, 8                                                   | -0,152753 | 0,0494953 | downReg_in_11q | 11q25   |
| 218641_at   | <i>C11orf95</i> | chromosome 11 open reading frame 95                                                                         | 0,3267782 | 0,0499187 | upReg_in_11q   | 11q13   |

logFC: log fold change; adj.P.Val: adjusted p-value; ; downReg: downregulated; upReg: upregulated

**Supplemental Table 9.** Mutational study on the *ETS1* gene.

| Case     | Mutation type   | Position* | Ref nt <sup>†</sup> | Obs nt | Predominant allele | Effect <sup>‡</sup> | SIFT prediction (score <sup>¶</sup> ) | Polyphen prediction |
|----------|-----------------|-----------|---------------------|--------|--------------------|---------------------|---------------------------------------|---------------------|
| Case 1   | unmutated       | -         | -                   | -      | -                  | -                   | -                                     | -                   |
| Case 2   | unmutated       | -         | -                   | -      | -                  | -                   | -                                     | -                   |
| Case 3   | splice site     | 127897017 | G                   | A      | mut                | -                   | -                                     | -                   |
| Case 4   | non-mutated     |           |                     |        |                    |                     |                                       |                     |
| Case 5   | missense        | 127897075 | C                   | G      | mut                | P9A                 | Tolerated (0.07)                      | Probably damaging   |
|          | silent          | 127838731 | C                   | T      | wt                 | G331G               | -                                     | -                   |
| Case 6   | unmutated       | -         | -                   | -      | -                  | -                   | -                                     | -                   |
| Case 7   | missense        | 127897036 | G                   | A      | wt                 | E22K                | Tolerated (0.09)                      | Benign              |
|          | missense        | 127855487 | C                   | T      | balanced           | S267F               | Tolerated (0.70)                      | Benign              |
|          | silent          | 127860006 | C                   | T      | mut homo           | D204D               | -                                     | -                   |
| Case 8   | nonsense        | 127861193 | T                   | A      | mut                | Y154X               | -                                     | -                   |
| Case 9   | not applicable# |           |                     |        |                    |                     |                                       |                     |
| Case 10  | unmutated       | -         | -                   | -      | -                  | -                   | -                                     | -                   |
| Case 11  | unmutated       | -         | -                   | -      | -                  | -                   | -                                     | -                   |
| Case 12  | not done        |           |                     |        |                    |                     |                                       |                     |
| MPI-078  | unmutated       | -         | -                   | -      | -                  | -                   | -                                     | -                   |
| MPI-086  | unmutated       | -         | -                   | -      | -                  | -                   | -                                     | -                   |
| MPI-148  | not done        |           |                     |        |                    |                     |                                       |                     |
| MPI-315  | unmutated       | -         | -                   | -      | -                  | -                   | -                                     | -                   |
| MPI-382  | unmutated       |           |                     |        |                    |                     |                                       |                     |
| SU-DHL-5 | unmutated       | -         | -                   | -      | -                  | -                   | -                                     | -                   |
| HT       | unmutated       | -         | -                   | -      | -                  | -                   | -                                     | -                   |

\*Numbering according to the Human Genome hg18 assembly; <sup>†</sup>Minus strand; <sup>‡</sup>Numbering according to GenBank accession No. NP\_005229.1 (protein); <sup>¶</sup>Threshold for intolerance is 0.05; #Case 9 showed a homozygous deletion including *ETS1* Abbreviations: Ref nt, reference nucleotide; Obs nt, observed nucleotide.

## V. Supplemental figures

**Supplemental Figure 1.** Case 10 presented with follicular (A, C, D) and diffuse (B, E, F) growth pattern. This finding including the presence of follicular dendritic cells prompted the pathology panel in the review blinded for molecular analysis to diagnose a follicular lymphoma with transformation to DLBCL. The diffuse areas however, show small blasts with a narrow rim of cytoplasm and a starry sky pattern (B). The proliferation is more than 90% (C+E). (A+B Hematoxylin and Eosin, C+E Ki67, D+F CD21).

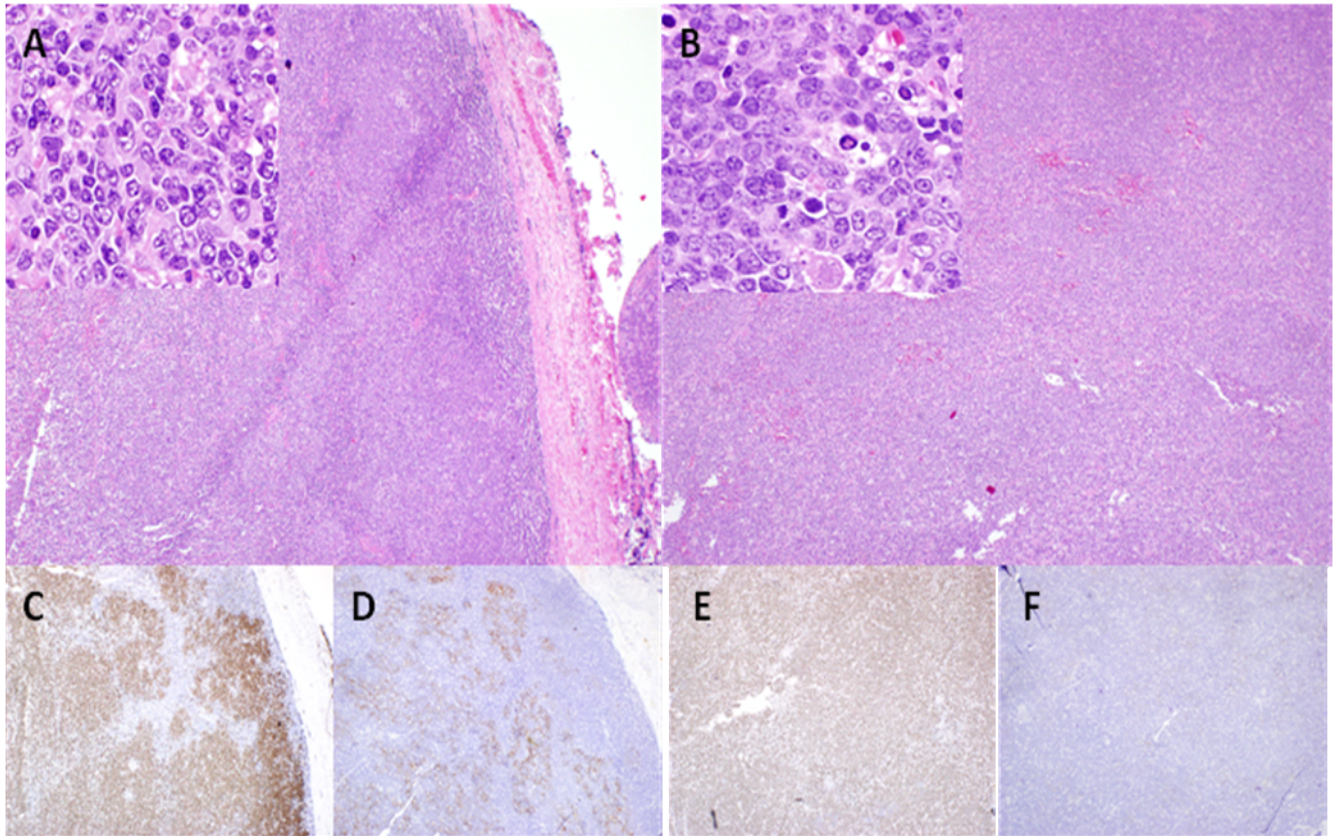

**Supplemental Figure 2. 11q alterations in *MYC*-negative lymphomas classified as BL by both gene expression classifiers.** Chromosome 11 profile of MMML cases MPI-086 (A) and MPI-382 (B). (C) Proportion of gain and losses along chromosomes of cases MPI-086 and MPI-382. Blue columns indicate chromosomal gain, whereas red columns indicate loss of genetic material.

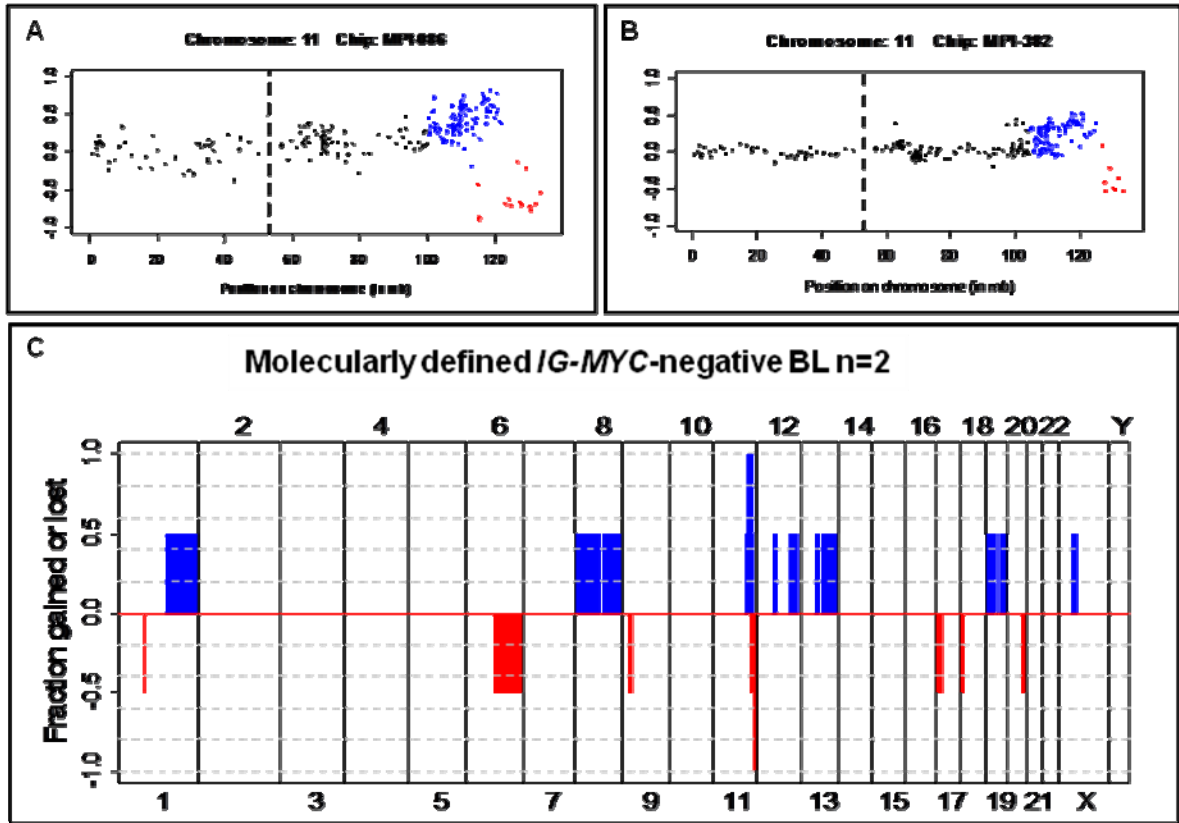

**Supplemental Figure 3. Methylation analysis of hsa-mir-34b.** Methylation levels of hsa-mir-34b in *MYC*-negative high-grade lymphomas (cohort 2) in comparison with *IG-MYC*-positive molecular BL and cell lines.

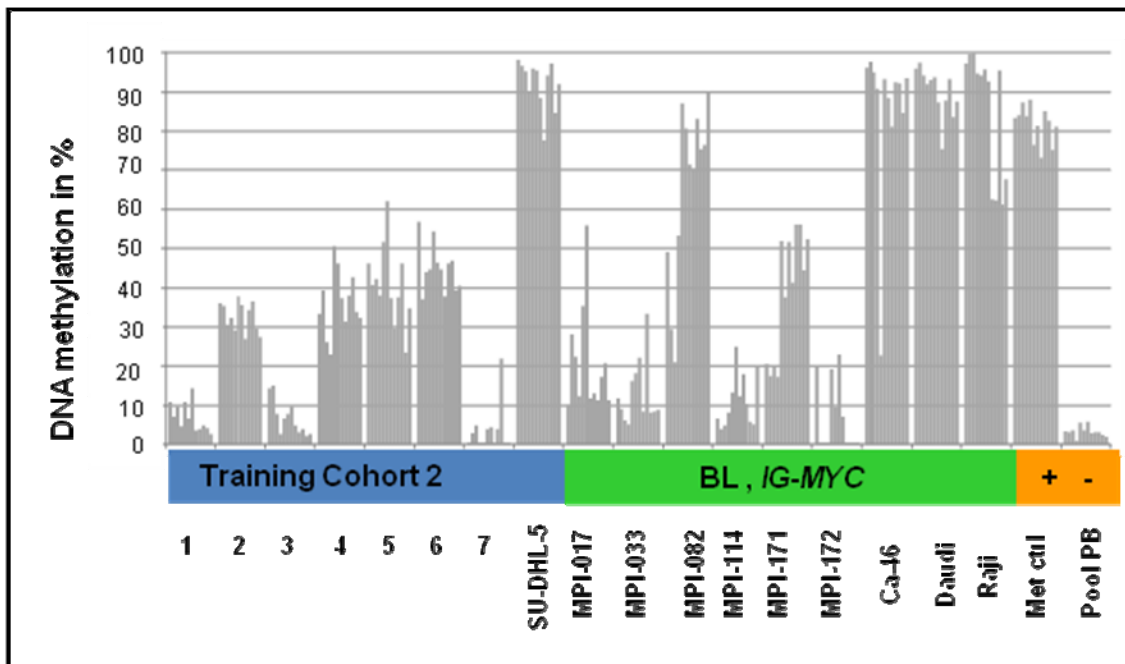

**Supplemental Figure 4. 11q alterations in cohort 2 and cohort 3.** Diagrams of (A) focal homozygous deletion of 11q24.2-q24.3 of case 9 from the cohort 2 (B) breakpoint region defined as change from gain to loss at chromosome 11. Fragile sites FRAG11G and FRAG11B location region according to Fechter *et al*<sup>25</sup> are indicated as green and orange lines, respectively.

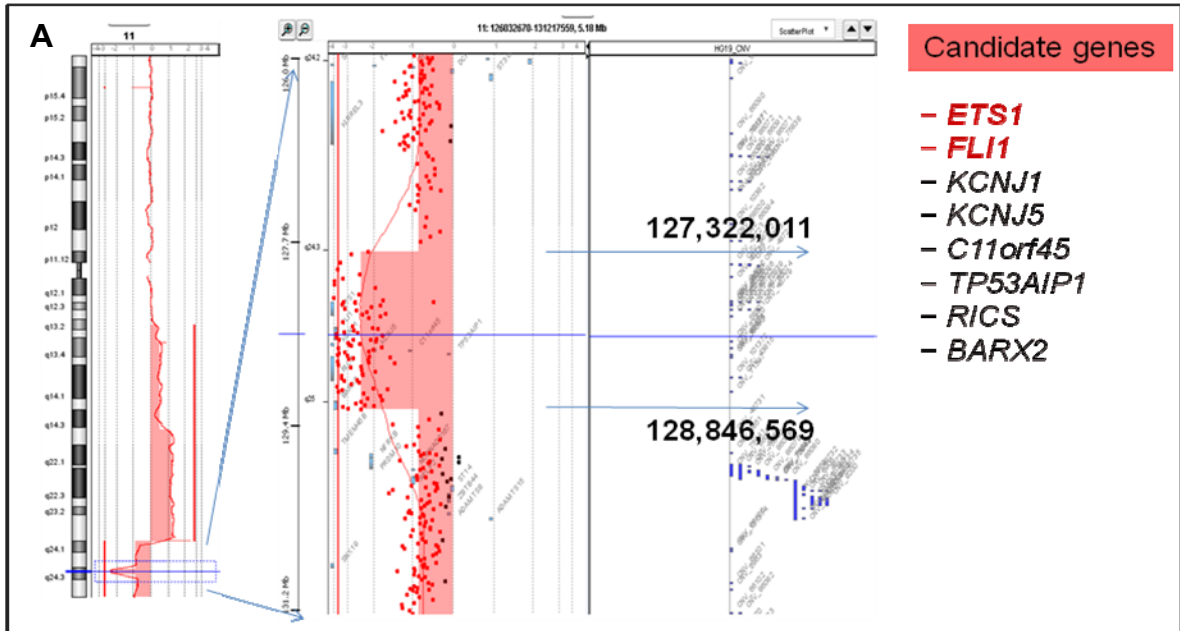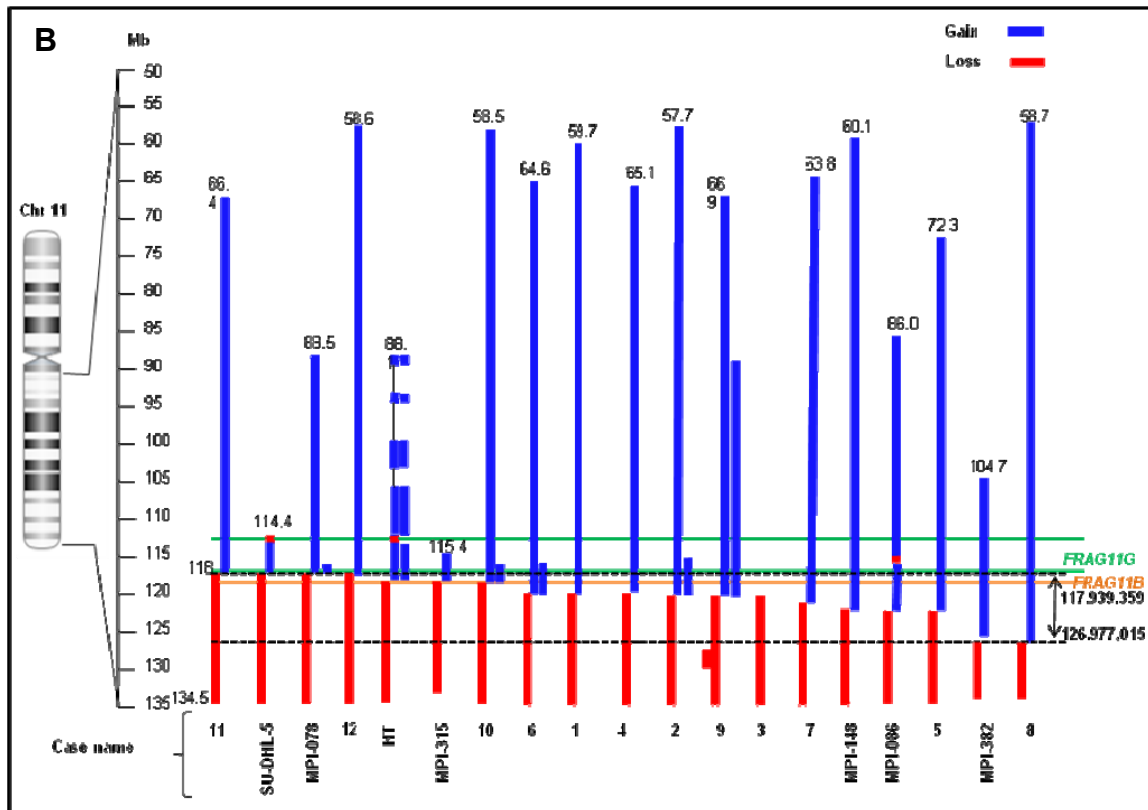

**Supplemental Figure 5. Survival analysis in the *MYC*-negative 11q lymphomas.** Kaplan-Meier analysis comparing cases with the 11q-gain/loss pattern (cohort 2 and cohort 3, n=16) with *IG-MYC* positive mBL cases ( $\leq 40$  years, n=51).

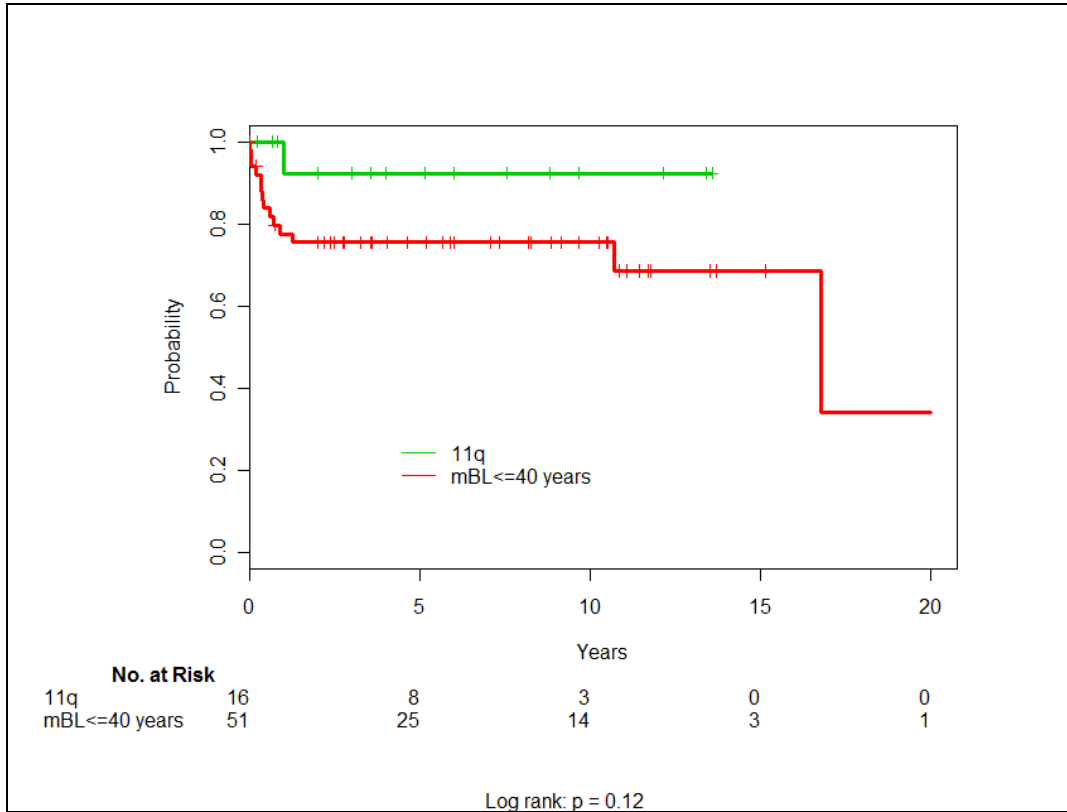



**Supplemental Figure 6. Differentially expressed genes located in the minimal region of gain chr11:114530818-117939359 (n=47 probesets).** Comparison of GEP of the cases with 11q alterations (cohort 3) (n=6) versus (A) *IG-MYC* mBL (n=46) and (B) DLBCL (n=198). Probesets with FDR < 0.1 are shown in red. Vertical lines indicate univariate 95% confidence intervals for the fold changes between the two compared groups. (C) Western blot showing the protein expression level of the *PFAFH1B2* gene which lie within the minimal region of gain on chromosome 11q, in different cell lines. Asterisks indicate those cell lines with known 11q aberration.

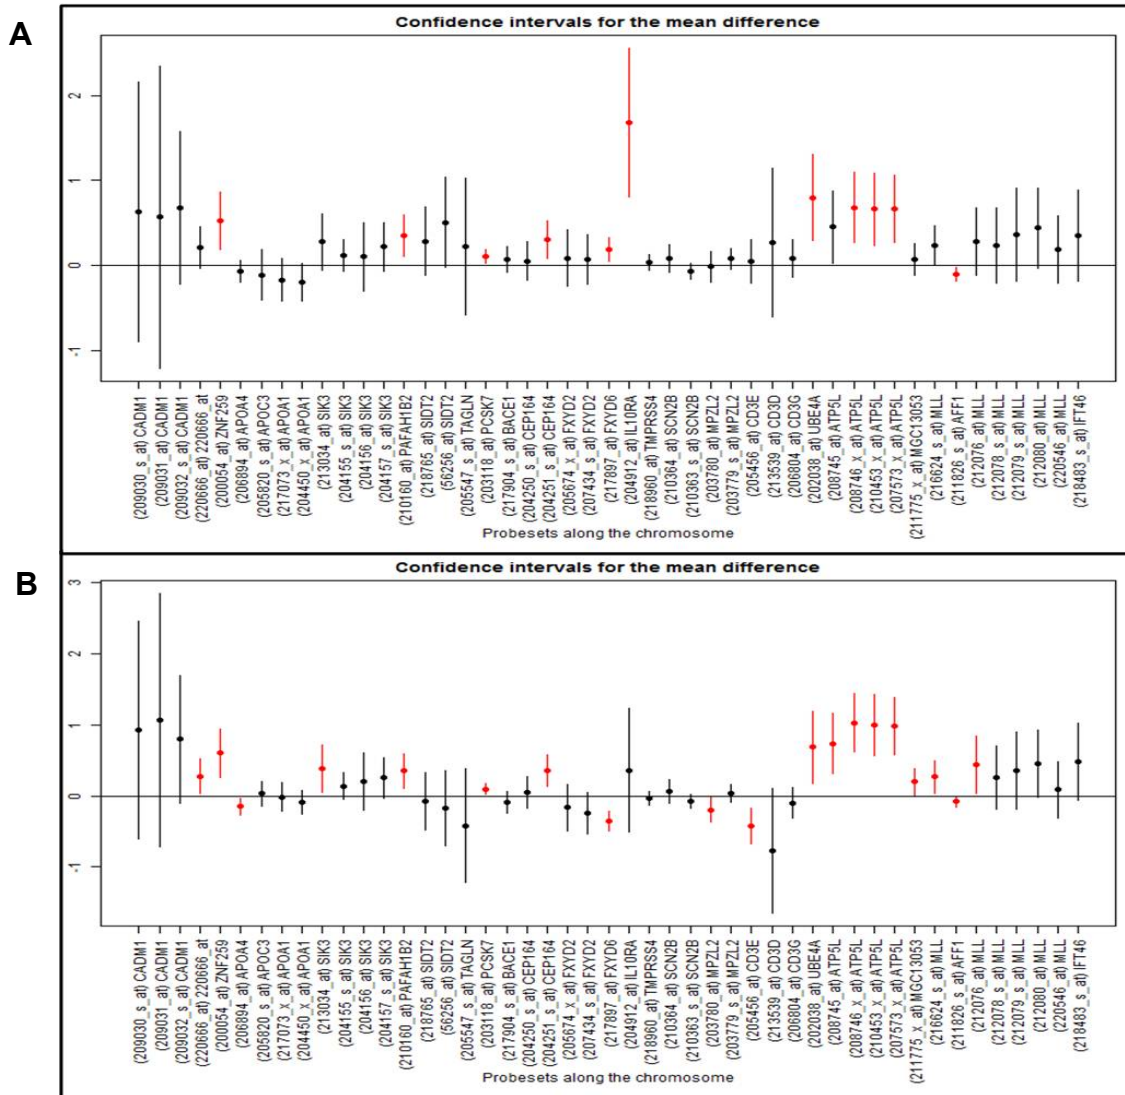

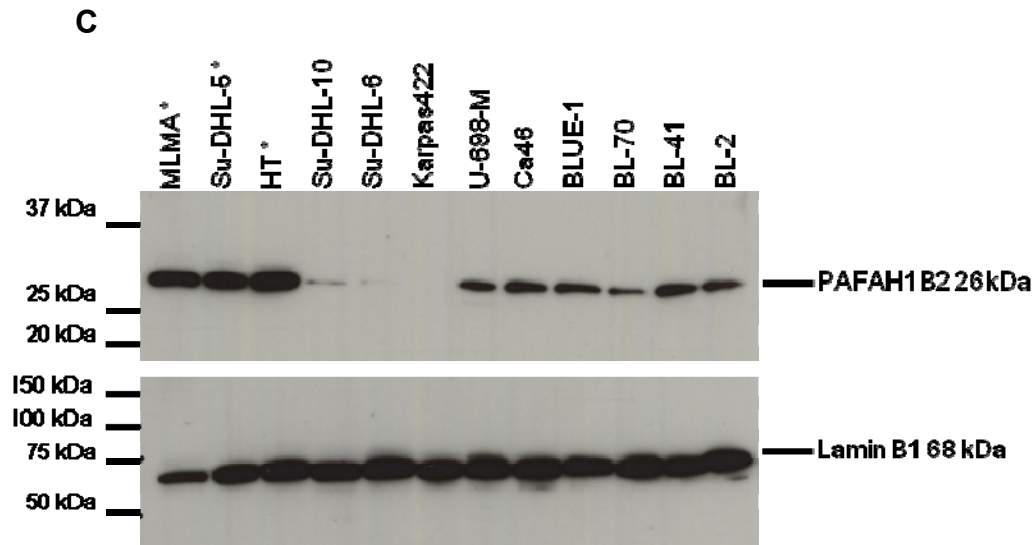

Remark: The MLMA cell line also shows the typical pattern of 11q aberration identified in this paper (see: <http://www.sanger.ac.uk/genetics/CGP/CellLines/>, and data not shown). As it has been described as “hairy cell leukemia” or “hairy cell B-cell lymphoma” (<http://cellbank.nibio.go.jp/legacy/celldata/jcra0146.htm>)<sup>30</sup> it has not been used for definition of the minimal regions throughout this paper.

**Supplemental Figure 7. Differentially expressed genes located in the minimal region of loss chr11: 126,977,015-134,445,937 (n=44 probesets).** Comparison of the GEP of the cases with 11q-gain/loss pattern (cohort 3) (n=6) *versus* (A) *IG-MYC* molecular BL (n=46) and (B) DLBCL (n=198). Probesets with FDR < 0.1 are shown in red. Vertical lines indicate univariate 95% confidence intervals for the fold changes between the two compared groups. (C) Non-synonymous mutations detected on the *ETS1* gene, corresponding to three transitions and two transversions. In total, three mutations were missense, one was located in the splice donor site of the intron 1 and another one was an inactivating mutation (p.Y154X).

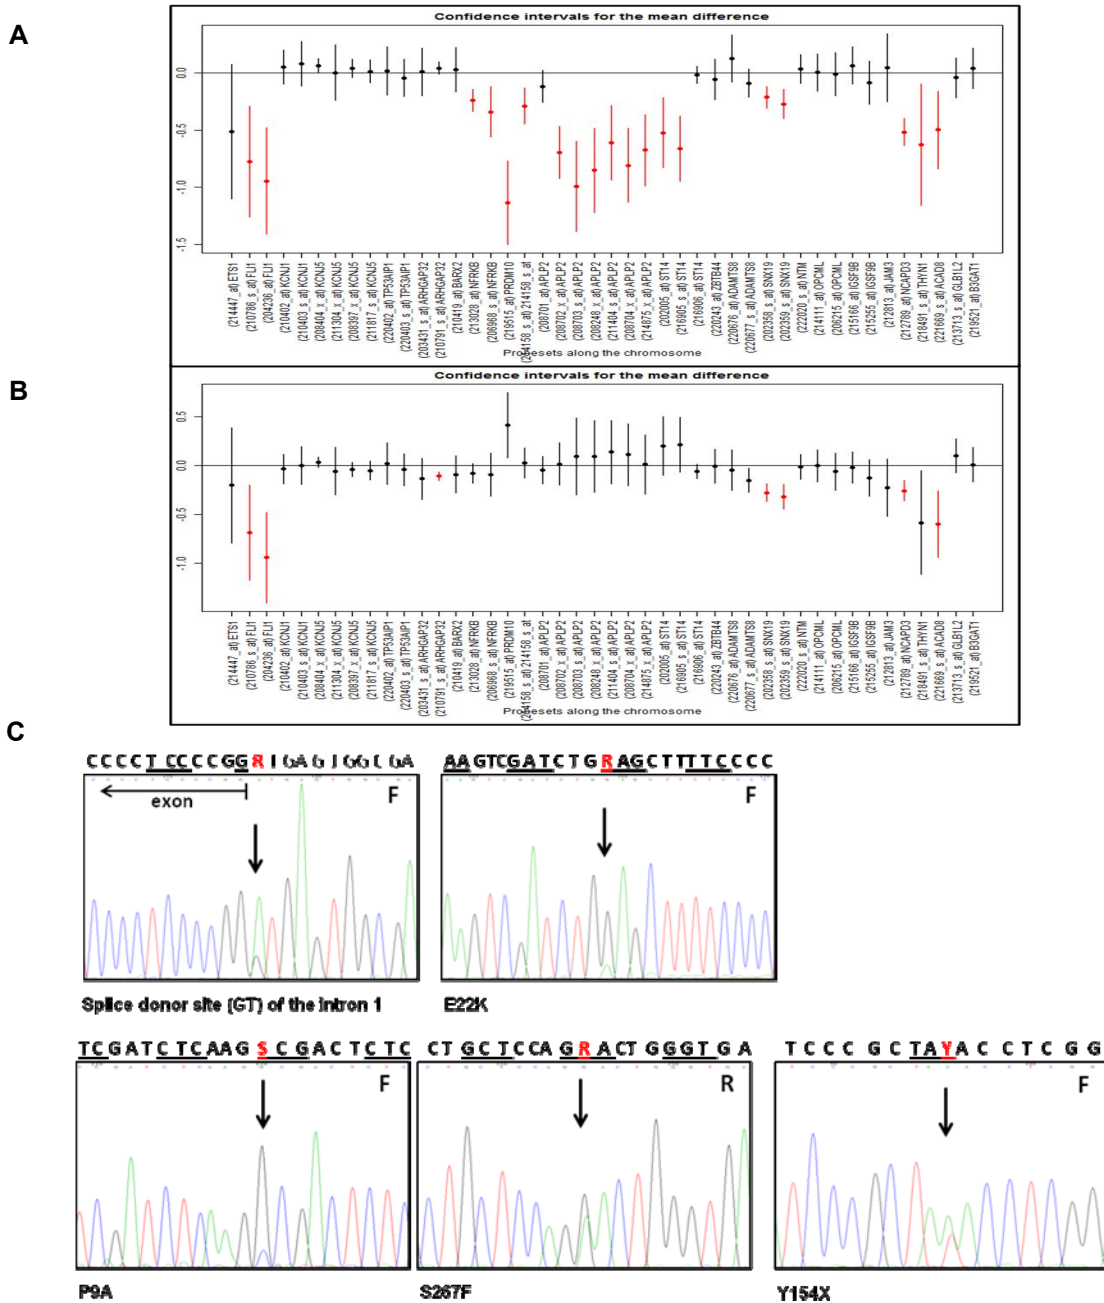

**Supplemental Figure 8. GEP analysis of 11q-gain/loss pattern versus *IG-MYC* BL and DLBCL.** Heatmap of Top 250 differentially expressed genes (A) *IG-MYC* BL (n=46) versus cohort 3 (n=6) (B) DLBCL (n=198) versus cohort 3 (n=6).

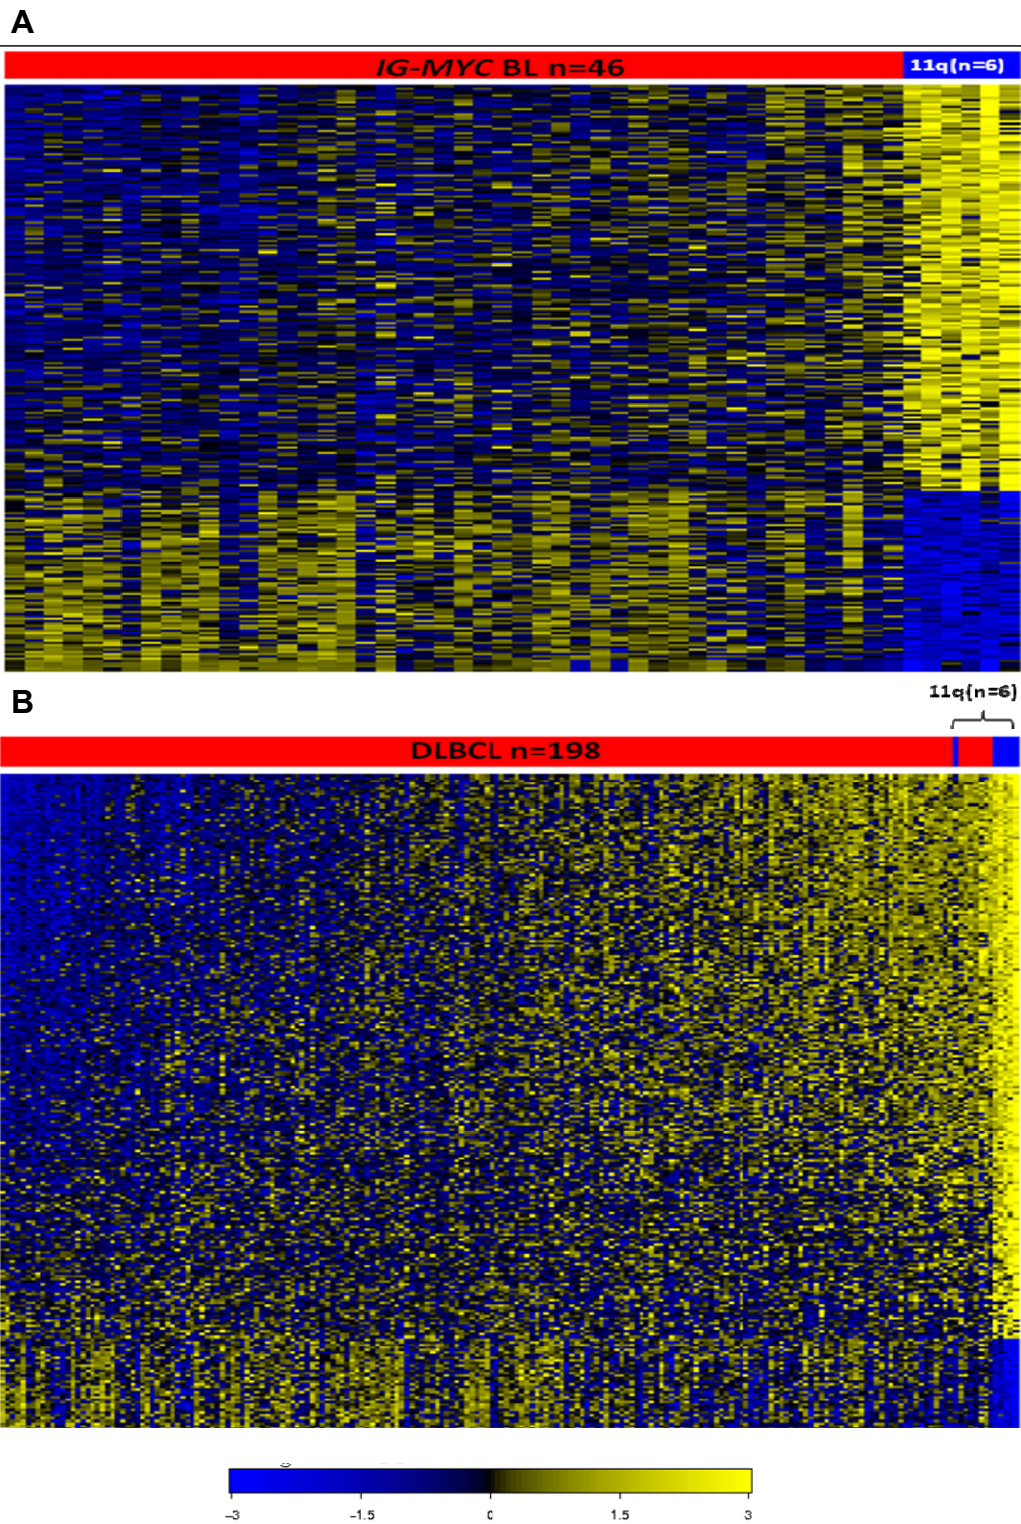

**Supplemental Figure 9. Cluster analysis.** (A) Clear separation between 11q-gain/loss pattern (red) and *IG-MYC* BL samples (blue) with no group-interference. Distance calculation based on Top 250 differentially expressed genes. (B) Clear separation between 11q-gain/loss pattern (red) and DLBCL samples (blue) with only MPI-315 appearing closer related to the DLBCL. Distance calculation based on Top 250 differentially expressed genes.

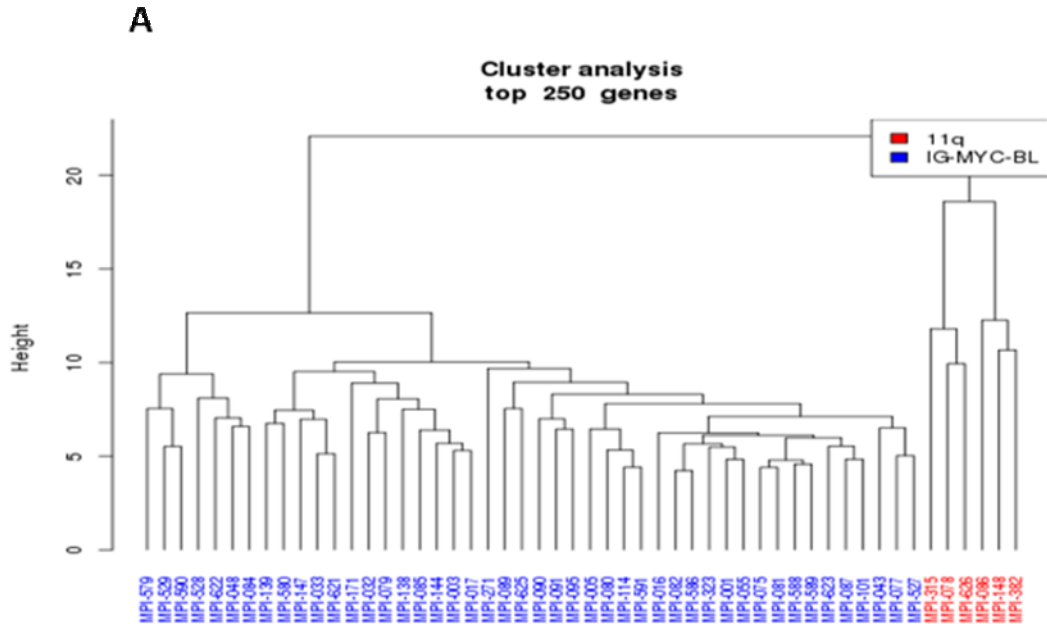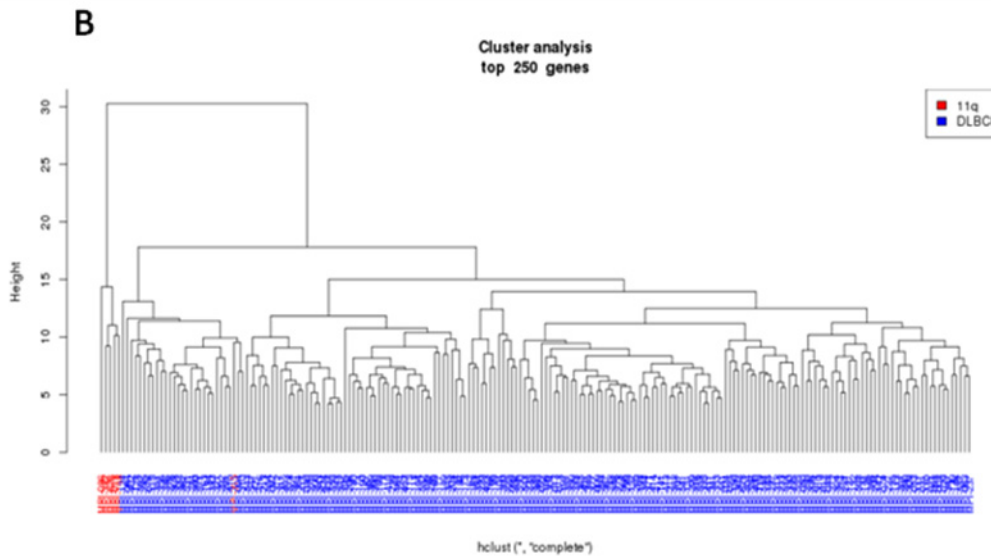

**Supplemental Figure 10. Scatter Plot of the PI3K pathway activity against MYC activation index in human BL.**<sup>31</sup> Cases were classified as molecular BL (mBL), intermediate, and non-mBL in the original study and shown as red, grey and blue dots respectively. Cases with 11q-gain/loss pattern are represented with a cross.

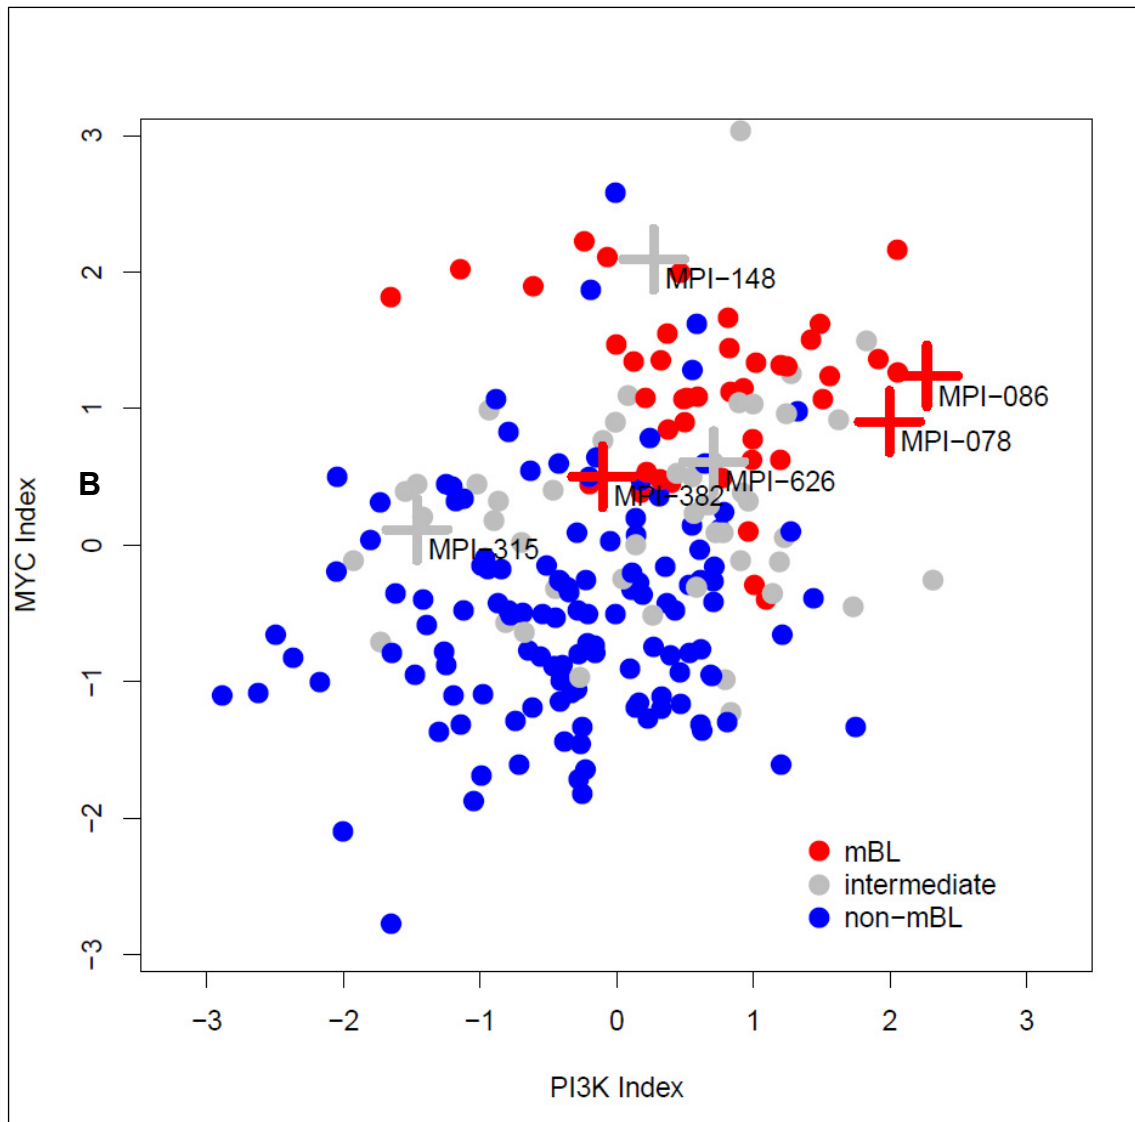

## VI. Supplemental references

1. Pienkowska-Grela B, Rymkiewicz G, Grygalewicz B et al. Partial trisomy 11, dup(11)(q23q13), as a defect characterizing lymphomas with Burkitt pathomorphology without MYC gene rearrangement. *Med Oncol*. 2011;28(4):1589-1595.
2. Rymkiewicz G, Walewski J, Blachnio K et al. MYC negative BL with a partial trisomy 11, dup(11)(q23.3q13.1). Can inverted duplication of CCND1, ATM and MLL genes be a substitute for MYC translocations? *Unpublished*. 2013
3. Hummel M, Bentink S, Berger H et al. A biologic definition of Burkitt's lymphoma from transcriptional and genomic profiling. *N Engl J Med*. 2006;354(23):2419-2430.
4. Bentink S, Wessendorf S, Schwaenen C et al. Pathway activation patterns in diffuse large B-cell lymphomas. *Leukemia*. 2008;22(9):1746-1754.
5. Oschlies I, Salaverria I, Mahn F et al. Pediatric follicular lymphoma--a clinico-pathological study of a population-based series of patients treated within the Non-Hodgkin's Lymphoma--Berlin-Frankfurt-Munster (NHL-BFM) multicenter trials. *Haematologica*. 2010;95(2):253-259.
6. Martin-Guerrero I, Salaverria I, Burkhardt B et al. Recurrent loss of heterozygosity in 1p36 associated with TNFRSF14 mutations in IRF4 translocation negative pediatric follicular lymphomas. *Haematologica*. 2013;98(8):1237-1241.
7. Swerdlow S, Campo E, Harris N et al (Editors). WHO Classification of Tumours of Haematopoietic and Lymphoid Tissues. Lyon, 2008.
8. Nagel I, Akasaka T, Klapper W et al. Identification of the gene encoding cyclin E1 (CCNE1) as a novel IGH translocation partner in t(14;19)(q32;q12) in diffuse large B-cell lymphoma. *Haematologica*. 2009;94(7):1020-1023.
9. Korn JM, Kuruvilla FG, McCarroll SA et al. Integrated genotype calling and association analysis of SNPs, common copy number polymorphisms and rare CNVs. *Nat Genet*. 2008;40(10):1253-1260.
10. Kreuz M, Rosolowski M, Berger H et al. Development and implementation of an analysis tool for array-based comparative genomic hybridization. *Methods Inf Med*. 2007;46(5):608-613.
11. Li H, Handsaker B, Wysoker A et al. The Sequence Alignment/Map format and SAMtools. *Bioinformatics*. 2009;25(16):2078-2079.
12. Jones DT, Jager N, Kool M et al. Dissecting the genomic complexity underlying medulloblastoma. *Nature*. 2012;488(7409):100-105.
13. Richter J, Schlesner M, Hoffmann S et al. Recurrent mutation of the ID3 gene in Burkitt lymphoma identified by integrated genome, exome and transcriptome sequencing. *Nat Genet*. 2012;44(12):1316-1320.
14. Wang K, Li M, Hakonarson H. ANNOVAR: functional annotation of genetic variants from high-throughput sequencing data. *Nucleic Acids Res*. 2010;38(16):e164.
15. Quinlan AR, Hall IM. BEDTools: a flexible suite of utilities for comparing genomic features. *Bioinformatics*. 2010;26(6):841-842.

16. Smyth GK. Linear models and empirical bayes methods for assessing differential expression in microarray experiments. *Stat Appl Genet Mol Biol*. 2004;Article 3.
17. Benjamini Y, Hochberg Y. Controlling the false discovery rate: a practical and powerful approach to multiple testing. *Journal of the Royal Statistical Society, Series B (Methodological)*. 1995;57:289-300.
18. Pollard K, Dudoit S, van der Laan M. Multiple Testing Procedures: R multitest Package and Applications to Genomics. *Bioinformatics and Computational Biology Solutions Using R and Bioconductor*.: Springer; 2005:251-272.
19. Wang X, Terfve C, Rose JC, Markowitz F. HTSanalyzeR: an R/Bioconductor package for integrated network analysis of high-throughput screens. *Bioinformatics*. 2011;27(6):879-880.
20. Leucci E, Cocco M, Onnis A et al. MYC translocation-negative classical Burkitt lymphoma cases: an alternative pathogenetic mechanism involving miRNA deregulation. *J Pathol*. 2008;216(4):440-450.
21. Biggar RJ, Nkrumah FK, Henle W, Levine PH. Very late relapses in patients with Burkitt's lymphoma: clinical and serologic studies. *J Natl Cancer Inst*. 1981;66(3):439-444.
22. Koduru PR, Offit K, Jhanwar SC. Molecular analysis of structural chromosome changes affecting chromosome band 11q23. *Dis Markers*. 1989;7(3):145-152.
23. Mikraki V, Jhanwar SC, Filippa DA, Wollner N, Chaganti RS. Distinct patterns of chromosome abnormalities characterize childhood non-Hodgkin's lymphoma. *Br J Haematol*. 1992;80(1):15-20.
24. Poirel HA, Cairo MS, Heerema NA et al. Specific cytogenetic abnormalities are associated with a significantly inferior outcome in children and adolescents with mature B-cell non-Hodgkin's lymphoma: results of the FAB/LMB 96 international study. *Leukemia*. 2009;23(2):323-331.
25. Fechter A, Buettel I, Kuehnel E, Savelyeva L, Schwab M. Common fragile site FRA11G and rare fragile site FRA11B at 11q23.3 encompass distinct genomic regions. *Genes Chromosomes Cancer*. 2007;46(1):98-106.
26. Krug U, Ganser A, Koeffler HP. Tumor suppressor genes in normal and malignant hematopoiesis. *Oncogene*. 2002;21(21):3475-3495.
27. Mackereth CD, Scharpf M, Gentile LN et al. Diversity in structure and function of the Ets family PNT domains. *J Mol Biol*. 2004;342(4):1249-1264.
28. Oricchio E, Nanjangud G, Wolfe AL et al. The Eph-receptor A7 is a soluble tumor suppressor for follicular lymphoma. *Cell*. 2011;147(3):554-564.
29. Pasqualucci L, Compagno M, Houldsworth J et al. Inactivation of the PRDM1/BLIMP1 gene in diffuse large B cell lymphoma. *J Exp Med*. 2006;203(2):311-317.
30. Saito Y, Miyagawa Y, Onda K et al. B-cell-activating factor inhibits CD20-mediated and B-cell receptor-mediated apoptosis in human B cells. *Immunology*. 2008;125(4):570-590.
31. Sander S, Calado DP, Srinivasan L et al. Synergy between PI3K signaling and MYC in Burkitt lymphomagenesis. *Cancer Cell*. 2012;22(2):167-179.
